# Supplementary material
Source: publisher site journal article supplement (https://www.spandidos-publications.com/5061/downloadSupplementary)
Supplement: Supplementary file 1 [file downloadSupplementary]

## Sheet: Supplementary Table 1
Table SII. Expression profiling of ferroptosis-related genes in TCGA pancreatic adenocarcinoma data set.
ID	TCGA-YB-A89D-11A-11R-A36G-07	TCGA-HV-A5A3-11A-11R-A26U-07	TCGA-H6-A45N-11A-12R-A26U-07	TCGA-H6-8124-11A-01R-2404-07	TCGA-FB-AAQ1-01A-12R-A41B-07	TCGA-IB-7888-01A-11R-2156-07	TCGA-2J-AABO-01A-21R-A41B-07	TCGA-FB-A5VM-01A-11R-A32O-07	TCGA-HZ-8315-01A-11R-2404-07	TCGA-IB-7893-01A-11R-2204-07	TCGA-2L-AAQE-01A-11R-A39D-07	TCGA-HZ-8003-01A-21R-2204-07	TCGA-YH-A8SY-01A-11R-A37L-07	TCGA-M8-A5N4-01A-11R-A26U-07	TCGA-2J-AABT-01A-11R-A41B-07	TCGA-IB-AAUU-01A-11R-A37L-07	TCGA-PZ-A5RE-01A-11R-A32O-07	TCGA-HV-A7OL-01A-11R-A33R-07	TCGA-IB-7897-01A-21R-2204-07	TCGA-H6-A45N-01A-11R-A26U-07	TCGA-3A-A9IX-01A-11R-A41B-07	TCGA-XD-AAUH-01A-42R-A41B-07	TCGA-HZ-A77O-01A-11R-A33R-07	TCGA-IB-A5SO-01A-11R-A32O-07	TCGA-F2-6879-01A-11R-2156-07	TCGA-3A-A9IV-01A-11R-A41B-07	TCGA-HZ-8519-01A-11R-2404-07	TCGA-3A-A9IR-01A-11R-A38C-07	TCGA-HV-AA8V-01A-11R-A41B-07	TCGA-Q3-A5QY-01A-12R-A32O-07	TCGA-HZ-A9TJ-06A-11R-A41B-07	TCGA-3A-A9IL-01A-11R-A38C-07	TCGA-H6-8124-01A-11R-2404-07	TCGA-3E-AAAY-01A-11R-A38C-07	TCGA-HZ-A9TJ-01A-11R-A41I-07	TCGA-LB-A8F3-01A-11R-A36G-07	TCGA-US-A77E-01A-11R-A32O-07	TCGA-YY-A8LH-01A-11R-A36G-07	TCGA-IB-7654-01A-11R-2156-07	TCGA-FB-A78T-01A-12R-A32O-07	TCGA-2J-AAB8-01A-12R-A41B-07	TCGA-FB-A4P6-01A-12R-A26U-07	TCGA-3A-A9I5-01A-11R-A38C-07	TCGA-HZ-8005-01A-11R-2204-07	TCGA-2J-AAB9-01A-11R-A41B-07	TCGA-XN-A8T5-01A-12R-A36G-07	TCGA-HZ-8638-01A-11R-2404-07	TCGA-L1-A7W4-01A-12R-A36G-07	TCGA-US-A779-01A-11R-A32O-07
SLC7A11	0.366916	0.28436	0.193226	0.276536	1.7391	2.70194	0.893708	0.361764	0.614978	2.84397	1.61576	1.19965	1.9039	2.47725	0.632373	1.77113	3.32417	1.23439	1.24173	1.86151	0.57557	0.466646	0.492827	1.91317	3.26853	3.48888	0.776194	0.022455	1.41009	0.575826	0.227957	0.243224	2.28866	2.95573	4.90482	2.41689	1.90177	6.73094	3.33705	0.565664	5.28414	0.915045	0.212591	2.33337	0.651735	2.80681	2.43844	0.718501	0.725825
GPX4	148.477	121.068	64.0037	73.6279	132.6	47.8853	77.2239	309.547	56.1652	54.5035	162.69	28.5347	85.7653	91.0344	72.3952	76.4801	141.301	187.582	55.868	95.094	73.0782	96.3246	71.5398	106.889	50.275	131.837	84.1109	162.514	82.4913	137.694	96.5466	174.839	58.4568	94.8926	94.7092	138.36	100.882	121.908	48.0025	89.7841	85.7136	57.9599	134.201	85.2843	69.1178	85.4086	38.9935	78.9151	174.251
AKR1C1	3.20023	14.7183	0.431666	12.91	3.71329	2.11685	5.31981	3.21069	1.9621	6.38593	0.701741	0.779717	2.55282	0.458606	1.08147	9.15728	0.923083	0.773322	4.10839	2.34382	2.64717	1.69735	2.13123	1.74933	0.54492	1.43984	0.971814	0.0817215	2.14013	4.32036	0.707357	0.742517	0.982573	2.97403	1.38637	2.56097	3.43173	1.85656	0.328159	2.19545	0.701398	17.4945	13.57	0.362494	4.54386	1.63972	2.86536	0.444454	2.25876
AKR1C2	5.33691	0.995763	0.517571	1.37304	4.48467	2.46864	1.14193	1.90015	4.32247	3.18283	0.655093	0.46197	3.40387	0.225742	0.692511	4.99104	1.02719	0.649908	5.23093	1.9495	1.46486	2.12196	0.635136	0.770119	0.833726	0.293094	1.21825	0.0296181	1.96993	4.93822	0.814269	0.591223	5.3926	2.48974	0.749228	0.59243	2.6794	3.07048	0.371495	1.33381	0.820229	9.55801	8.73269	0.365642	3.28895	1.26262	3.37191	0.266518	1.56327
AKR1C3	14.0913	17.3922	0.604278	12.94	26.44	8.79342	17.8868	9.91124	13.4268	13.2985	6.85679	3.70088	15.3078	11.4286	12.1578	36.8662	18.9788	29.8816	11.0728	13.7799	7.71997	6.57278	7.15051	9.793	25.8101	4.16931	5.48266	0.435851	11.0131	14.4412	5.74569	1.41004	14.2367	16.5212	18.6964	9.2126	24.2076	18.6561	8.9808	18.1481	13.7371	24.8654	43.8201	6.4411	13.741	9.41519	62.3619	0.978345	34.5264
RB1	7.28056	9.66287	14.0872	11.3613	10.9553	12.1862	5.3376	3.85166	12.0406	15.5792	6.25615	6.90255	5.08858	7.76595	7.76954	9.35927	5.2085	3.80366	16.7871	9.4764	9.75528	8.45672	7.84922	8.43688	13.1915	12.5508	13.2848	9.1221	6.46306	7.52996	15.0752	7.27685	9.52222	10.7923	12.7988	3.86537	7.77596	8.57198	9.67561	3.04688	14.3445	10.8781	4.15868	6.88737	9.0906	8.43812	11.0258	4.42338	4.65485
HSPB1	612.882	644.184	64.5903	341.142	727.177	197.084	374.418	760.012	197.695	148.662	376.818	84.133	514.648	459.091	540.218	490.114	649.417	1062.42	105.785	296.275	195.797	197.896	632.254	312.177	344.026	84.8722	213.14	288.661	476.285	400.013	318.355	195.377	314.673	377.76	378.735	490.084	556.736	429.583	353.26	434.471	250.86	310.291	762.566	347.175	438.2	232.281	162.767	653.464	856.373
HSF1	17.7531	14.0999	17.2992	9.33185	24.8607	9.23141	15.5927	33.148	15.0001	11.5411	36.1629	7.87855	18.7173	21.7981	18.4292	16.6965	21.2661	22.168	8.46521	16.1858	12.4741	15.7388	19.7631	19.1915	23.5864	9.70567	13.4984	16.4124	18.2002	18.7075	20.6419	16.1537	13.6222	16.2113	19.1896	13.2206	19.0763	23.2993	14.0578	22.0399	11.8974	16.6917	19.6264	23.1114	20.559	16.8419	9.37906	55.6283	31.4153
GCLC	3.24494	3.53902	9.21506	5.98218	5.36571	6.15861	3.11262	3.27303	3.21123	2.77716	1.70918	2.78617	2.09167	2.92417	6.52133	2.57556	1.35801	1.07045	5.90435	3.8495	4.28012	4.09297	1.79242	2.59863	6.65244	15.0148	6.46657	3.98156	2.44915	4.5255	2.26979	2.94418	3.24137	3.67977	3.04825	1.33549	3.47369	3.15628	3.6099	2.7284	3.95462	5.93264	3.91691	5.30161	3.55464	4.03861	10.0939	3.03648	1.92311
NFE2L2	19.8604	21.3404	13.0339	21.407	17.437	27.1314	24.8315	16.1898	25.0885	19.9414	22.7742	12.1999	14.4125	16.8949	18.2717	21.4479	19.0649	8.92956	30.9769	17.9628	26.009	24.3132	12.6647	22.053	25.1161	8.0756	25.3681	16.0921	15.6348	17.2254	21.9282	10.4908	19.2365	22.7222	22.4648	14.6883	17.8664	21.3428	23.6668	19.1948	25.4628	20.8732	12.848	18.168	19.1795	26.078	23.5769	36.1274	26.1468
SQSTM1	42.2122	43.3388	21.0599	37.6305	77.4603	56.9883	27.596	26.6249	34.2848	32.5735	55.7753	19.747	26.5549	39.3346	41.3843	43.2091	53.9329	36.6072	28.0181	39.0877	32.5859	39.5314	31.1322	45.1441	34.2857	25.2202	38.7823	62.6381	32.2557	29.4889	49.6397	28.8014	36.0898	41.5257	97.0495	47.8139	42.4442	61.2635	60.1033	43.1202	51.1259	34.3487	59.2231	41.7607	39.9723	38.9949	31.6544	43.5644	42.7488
NQO1	43.4339	5.55688	2.17637	5.62634	110.981	82.8561	100.428	28.2873	61.9369	46.4126	45.6959	12.4222	61.4999	85.457	30.7614	140.887	136.077	123.668	23.8037	66.4003	26.0114	28.733	32.3463	62.0252	155.128	1.15332	24.5034	14.504	33.9355	40.3686	56.4248	2.55474	41.3597	97.4108	95.9282	100.909	56.6456	148.297	77.4809	110.702	134.86	28.599	170.51	38.5009	25.1544	48.5417	142.38	45.5314	132.995
HMOX1	61.3228	29.4384	128.457	32.9488	9.47611	22.2129	10.2649	17.5611	18.0444	23.9746	12.19	14.2825	10.6969	16.7034	10.537	15.0342	27.8843	23.0743	12.1649	15.7435	18.6536	42.6811	8.55881	21.062	7.37367	3.40369	13.6381	9.97341	16.5371	40.5142	10.0642	5.38851	9.29415	25.1522	8.27392	5.19959	10.2911	5.6996	11.7088	7.69106	10.5232	17.1524	9.59146	30.9594	14.8608	19.4901	6.7846	6.8486	12.7929
FTH1	410.344	274.361	168.302	235.68	311.895	162.066	155.479	346.296	149.511	197.142	318.166	113.148	248.745	216.44	217.524	234.105	380.185	207.257	134.576	282.934	179.932	188.47	174.332	300.515	207.159	84.4829	158.216	241.357	218.515	214.428	279.016	94.7828	220.744	252.486	266.822	226.861	200.577	280.119	126.255	170.628	145.521	195.545	249.619	361.365	316.843	172.243	106.803	161.83	209.341
MUC1	59.2994	55.8285	0.48627	18.1116	282.411	144.482	64.6093	60.6744	67.1345	82.9715	352.604	43.6091	92.4077	488.479	95.4843	304.727	271.237	475.497	17.6555	92.809	63.3128	34.7717	225.51	92.3502	383.439	1.24949	105.621	6.35149	134.792	14.4398	204.922	4.07036	283.857	149.609	547.771	82.6562	273.853	439.009	67.8215	307.932	315.768	234.557	160.588	52.1636	31.5927	32.8479	190.934	156.299	175.816
SLC3A2	37.1992	30.1633	15.914	28.3528	35.1859	31.5315	38.7209	42.1634	35.0195	19.7974	30.7202	18.0108	24.4457	22.9303	20.3477	34.6439	38.2595	39.886	29.3722	32.7656	25.1208	41.415	35.0231	33.826	19.2399	32.153	26.9257	21.1294	21.001	26.2268	20.0872	81.4172	28.2222	36.8166	42.1992	47.0359	40.0746	43.4198	20.5713	20.1452	24.3371	24.5629	33.169	46.2999	28.225	35.0364	15.1479	42.5388	28.2453
MT1G	11.3245	80.9042	0.267603	84.6476	14.0595	8.44473	25.0089	146.39	40.3276	1.93417	3.07089	187.125	3.90924	6.47562	5.72141	15.6491	8.76306	9.1087	10.33	12.8865	230.035	14.6877	123.311	7.53831	6.91641	0.235081	6.73511	11.3583	16.6029	4.38383	4.75731	2.97602	3.71091	60.1148	1.54768	25.2519	50.3926	25.6464	185.137	46.8145	18.3266	36.7843	7.42064	4.38896	124.103	8.13779	20.3563	1.25642	32.6694
SLC40A1	30.992	25.482	96.186	41.206	23.5031	45.4828	71.8808	5.18594	65.0332	36.2598	39.6795	26.2093	25.6491	41.8108	54.9728	102.118	37.5568	39.18	53.9938	55.3756	49.6242	28.3637	15.2351	34.2551	83.4378	34.8143	95.8251	28.0185	34.8157	29.9472	36.5595	28.5722	25.5661	64.6218	132.183	28.8711	76.1448	76.9659	77.4367	78.7991	56.4431	81.394	62.8741	6.44528	29.8123	48.8644	97.0442	2.6387	46.0108
CISD1	6.42697	6.6009	4.74684	6.39087	5.61063	10.9703	7.04791	11.8008	7.58089	5.51852	9.1238	4.45176	5.55551	5.39024	9.22894	9.1759	8.22186	9.65125	9.19689	5.87887	6.46073	8.1292	4.82486	6.80858	10.4388	8.96587	11.5597	25.9889	5.8621	4.30778	6.4198	6.63261	4.95605	10.5283	4.27016	7.39074	6.02523	8.96964	4.84361	4.20736	8.49177	5.10276	9.06511	5.40388	6.08199	9.39962	8.30173	6.74083	6.38333
FANCD2	0.543092	0.964709	5.63989	0.762483	1.68492	0.839638	0.670818	4.43812	0.966119	1.58106	1.65715	0.796914	0.797267	1.31961	1.00181	2.00366	1.06671	1.53924	1.08403	1.50357	1.11609	1.33562	1.5368	1.0856	1.60981	0.670419	0.715132	0.32529	1.05624	1.93834	2.01197	0.687783	1.45546	1.06731	1.71066	0.569695	1.37207	1.20191	0.384467	1.82128	1.15623	0.959789	0.900297	1.1787	0.894996	1.28863	2.05069	3.61794	0.936713
FTMT	0	0	0	0	0	0	0	0	0	0.0166699	0	0	0	0	0	0	0	0	0.019718	0	0	0	0	0	0	0	0	0	0	0	0	0	0	0	0	0	0	0	0	0	0	0	0	0.0203524	0	0	0	0	0
HSPA5	168.123	141.212	65.135	168.311	157.335	182.007	204.537	193.012	154.064	265.858	160.286	92.5296	152.795	153.359	95.2514	162.485	234.68	140.373	132.395	135.428	185.843	119.737	173.752	143.459	163.006	210.554	148.155	209.088	205.617	128.381	140.715	128.105	227.883	128.843	319.178	223.955	143.597	106.765	167.08	121.863	279.25	97.184	406.675	180.509	138.928	171.446	146.767	176.011	99.0774
ATF4	96.06	131.049	101.879	124.791	94.2803	94.977	181.174	172.646	109.265	65.722	101.597	78.8552	104.769	89.526	101.961	94.6664	107.621	103.517	72.7274	89.8473	124.555	126.814	94.5452	124.622	86.1498	142.387	88.7463	108.268	91.8099	141.89	80.8739	73.6269	101.186	130.336	135.783	135.806	135.097	111.344	99.7208	124.33	113.843	110.037	160.704	155.941	132.896	128.595	120.908	59.6365	187.804
TP53	10.3167	22.3658	23.6819	15.6359	7.51316	10.0046	13.7181	17.9636	12.7265	9.91372	12.0804	8.22042	11.6944	12.0478	6.89094	4.41524	11.4721	13.9167	9.52034	15.8643	11.2304	13.3555	16.0618	8.90994	14.9364	10.6227	11.4956	5.73635	14.0931	17.6888	14.1071	12.4121	10.7127	8.42942	13.0121	25.9745	5.91394	1.69024	16.8299	11.7017	9.62273	10.6301	20.5835	5.9678	10.2439	13.5147	12.0383	6.80321	5.08658
HELLS	0.418475	0.538139	1.6161	0.473741	0.949004	0.550112	0.580996	0.858527	0.885363	1.14647	1.29387	0.614751	1.31859	0.882622	0.513268	1.12741	0.772718	0.941489	0.758323	0.638496	0.707734	0.762064	1.02437	0.8801	1.06459	0.511291	0.623882	0.538885	0.686682	1.14711	0.900842	0.314209	1.16732	1.14725	1.09948	0.530532	0.951815	1.37651	0.229511	1.13248	1.41895	0.63133	0.873161	0.578227	0.685798	0.940909	1.44292	2.51101	0.896363
SCD	103.224	24.1038	6.09582	24.1067	47.8197	40.562	31.1805	24.9273	16.5249	34.1152	23.6445	22.7875	29.93	61.5283	21.2953	31.7297	38.9895	76.1391	167.403	26.3351	18.4254	265.391	15.7331	20.3241	163.938	63.2031	34.2606	3.83381	41.9379	65.8299	116.377	18.613	32.5676	30.4182	29.9316	44.9696	24.5737	47.4813	15.1058	40.5063	109.209	21.8363	48.7972	55.2274	13.9171	20.7568	14.1473	123.567	45.8121
FADS2	4.62366	9.35322	2.89422	9.88207	1.52899	6.28909	6.08218	3.06746	3.04744	11.3544	7.30708	2.90982	5.25823	5.08431	3.91379	6.18644	3.74989	2.13487	9.56207	4.36636	4.14269	5.28855	6.25096	9.69644	2.88299	17.5142	7.91146	19.6982	5.66826	9.48375	22.0728	12.6706	9.19598	3.77591	2.41058	11.5561	2.45286	0.794774	2.14606	1.08859	3.91788	4.23342	3.59309	3.58412	15.1444	6.58591	2.16195	10.268	10.5954
SRC	17.8681	18.7063	7.97914	12.0528	18.4656	19.859	21.9946	17.8153	23.0073	8.13063	21.1822	7.71146	22.1911	28.3788	12.3924	35.2825	29.6074	21.6751	8.60711	23.9698	13.4348	12.2025	16.4042	15.5921	31.7312	3.11142	12.9193	11.5159	21.927	11.2657	26.3801	10.1061	9.07934	20.1454	25.2053	14.2863	30.7601	34.5114	47.1721	52.6759	15.9144	26.1328	9.15941	16.5649	18.2432	14.1501	30.8109	18.3295	32.2048
STAT3	32.8532	30.7605	24.8031	36.8706	29.0905	41.758	26.3407	24.3917	34.4496	35.9503	18.8795	27.4816	25.4618	30.3159	38.4573	31.5832	23.3734	17.1791	56.6992	30.1719	33.8141	41.8427	24.6653	32.156	20.6598	35.6286	45.2726	23.9284	28.9133	22.7221	34.1999	24.1274	28.246	28.8173	31.1893	19.7568	28.5469	30.5842	29.8105	26.3452	25.6897	34.6608	23.0111	19.924	31.9119	32.3283	27.8761	22.9621	19.3271
PML	12.2497	11.1164	10.0284	8.90263	9.92003	8.13296	15.6392	12.7216	10.2094	6.17856	14.5115	5.43729	15.3617	12.68	7.52042	16.135	12.8565	22.2585	6.84686	10.5445	7.80983	7.90174	12.6674	15.8542	6.70494	3.11632	7.10405	4.32917	13.1697	9.6658	11.5106	6.96389	9.5997	12.3005	9.64818	5.64287	13.6775	17.1629	17.8035	13.7965	11.6732	8.92274	5.22837	18.9258	7.90368	8.75481	6.21486	3.58911	11.1906
MTOR	3.75445	5.08297	8.23552	6.07946	3.3681	5.56283	3.8266	2.39338	5.04394	5.01888	5.28932	4.12563	3.62528	3.4517	6.0683	4.46471	3.21084	2.47744	6.81186	4.94629	4.24003	4.2863	3.25713	4.21083	5.01653	3.14867	4.65128	5.26747	4.36152	4.58459	5.37422	3.35274	4.96484	4.1933	5.00013	2.38822	3.94404	3.307	5.93828	3.79755	4.89312	5.62367	2.45127	5.57699	3.75308	4.23263	6.66838	9.2156	3.42913
NFS1	2.77285	3.13866	4.32646	3.11846	4.182	2.95053	3.88636	3.23367	3.32613	2.87267	4.48079	1.88315	3.1142	3.13983	3.6826	3.48083	3.25574	3.03646	3.02392	3.46117	3.37227	4.2063	3.67086	3.26447	3.44213	7.49263	3.50455	5.63556	3.32246	3.13464	3.20479	5.64099	2.61039	4.33192	3.6729	3.41646	4.63246	3.99378	2.81543	3.14067	3.97668	3.68982	4.09265	3.88146	3.3019	2.94945	4.19754	5.09365	4.18954
TP63	0.328267	0.664252	0.273101	0.996153	0.0427811	0.503765	0.707717	10.2608	0.435205	1.19322	1.06268	0.346526	1.67981	0.147337	0.152064	0.312267	0.522497	0.262329	1.17191	0.490476	0.384012	0.386972	1.51381	0.336371	0.165163	0.0810967	0.069894	0.0217915	0.18591	0.578184	0.380346	0.152775	3.59379	0.270211	0.120765	0.153675	0.256597	0.183356	0.814391	0.0543047	0.362941	0.118401	0.0229233	0.292803	1.15653	0.131008	0.465256	0.0263369	1.40278
CDKN1A	105.832	59.6198	9.07155	57.1764	34.6911	33.4714	56.6816	86.2214	55.4695	68.0851	32.9367	20.9939	84.6801	64.5508	34.1816	89.251	64.4061	82.9067	55.2298	80.9651	44.7579	105.295	59.7705	90.8412	31.5434	66.1393	33.7473	48.4934	47.9146	86.3486	57.2458	15.8235	49.7836	60.2686	69.77	105.417	58.1955	75.3351	39.7942	59.2726	64.7513	30.0617	67.6437	72.1867	51.5833	56.9379	30.0862	66.7601	38.6541
ENPP2	11.8287	6.43843	12.5015	7.55799	7.49086	16.3172	8.28547	4.82904	5.75206	8.73855	5.66513	7.81642	2.73223	3.19895	5.10558	10.8171	7.8938	2.03783	29.1007	13.4485	9.19608	21.5811	2.32188	10.3942	18.4664	164.644	20.9366	4.22975	8.1464	8.28991	6.57497	45.6225	2.51785	9.65075	2.89028	12.4894	5.16187	8.93987	8.03453	2.76977	2.93104	6.41216	10.2117	1.73075	4.3572	14.3188	6.14314	2.89995	2.75662
VDAC2	19.7216	16.2438	12.5154	16.7087	20.8157	16.2405	18.1117	36.7245	17.8371	15.2437	22.4615	11.4826	21.795	21.0128	22.5869	26.6964	24.7674	25.9777	15.732	16.9787	15.1634	17.4513	17.6328	26.5669	24.6857	14.1038	17.4034	22.5235	16.3514	16.9425	18.2358	9.49054	15.5613	24.3023	16.1642	20.3747	18.9441	26.5333	18.6773	23.4763	20.8682	15.702	22.7608	24.585	23.2202	20.5436	20.3189	34.7701	20.4967
FH	19.3349	24.6792	17.12	23.6816	15.354	30.7488	18.5596	24.9939	18.2629	22.4786	18.0078	13.9558	23.4854	15.6551	27.0634	25.2604	21.8596	29.8941	19.5411	21.1578	17.9393	20.9773	31.463	19.8228	28.1823	26.5513	30.7522	27.6705	17.5047	16.926	24.1665	16.7468	16.7371	27.7754	24.7065	53.3888	18.7428	29.3697	16.2349	20.5245	24.6083	17.122	49.7545	16.0607	18.069	20.87	37.5485	21.1896	22.1283
CISD2	11.9302	11.982	6.11487	10.7677	15.7631	14.0869	11.4666	7.48848	14.005	12.2753	10.4941	7.82208	12.6247	9.74538	6.49073	15.9123	12.7585	15.1056	11.3553	9.55286	9.28955	8.31738	14.0235	8.34154	13.7957	24.4144	10.7785	14.4275	9.58323	7.90789	7.76042	10.073	22.7395	13.3633	13.2666	13.9727	10.242	13.808	11.0106	7.69596	9.47347	11.5729	11.0018	10.1835	9.40365	9.60387	14.0927	13.9311	10.4162
CBS	0	0.34336	0.0169005	0.0679334	0.0156641	0.0221342	0.00508094	0.0346991	0.0609274	0.269909	0	0.594329	0.0389825	0.093508	0.0357928	0.0261615	0.0358707	0.021885	0.076623	0.0320054	0.0715804	0.0293148	0.258866	0.0241492	0.0142691	0.0445399	0.0500701	0	0.10794	0.00327371	0.0596838	0.0134251	0.0666471	0.0848029	0.0593448	0.233511	0.0281856	0.0236947	0.157004	0.137455	0.0128603	0.00963378	0.00359711	0.00527255	0.145564	0.0879416	0.00783226	0.00289295	0.0328542
ISCU	17.3386	20.0611	29.3047	20.8704	12.9213	21.3737	14.2919	22.0042	20.2904	12.6656	12.0644	10.229	10.7318	11.3973	26.4528	12.4647	17.528	18.3841	20.0692	21.5199	17.9968	24.9671	8.88305	18.9312	15.8677	28.4556	22.9094	30.4286	13.4818	28.296	23.1576	32.1086	8.4878	20.4881	17.9309	12.5328	18.0926	15.2271	14.5209	15.0818	15.197	17.209	12.1363	10.0633	15.9511	20.8746	18.0139	13.9088	16.7852
ACSL3	10.0553	8.10942	6.52242	9.61242	5.76705	14.2942	12.3011	9.1479	11.2566	14.926	8.13131	6.80782	7.49333	8.98355	12.4688	12.7673	10.144	7.9589	11.4909	9.78949	8.29542	9.43134	9.49408	10.4935	20.7569	19.5549	13.796	8.06186	9.0179	6.17673	9.03583	6.13434	15.5833	11.0087	12.7149	16.191	8.49609	11.6291	14.9229	9.48036	18.0687	11.5264	9.51788	8.28514	7.74585	7.72191	21.2672	14.4959	9.24743
OTUB1	14.856	18.6765	17.2589	13.9865	22.1	15.1723	18.3122	28.4186	11.7507	11.1269	21.8275	7.94614	18.2934	21.9952	12.8667	21.7368	23.4021	30.3832	9.92635	18.2958	12.6144	16.0354	23.5172	14.9933	16.757	11.3664	15.7514	27.9043	15.5636	19.2678	17.7611	20.3641	15.7323	19.1719	18.1219	21.385	15.8434	23.636	12.0497	13.912	16.9764	16.4356	25.6497	14.6645	16.6944	17.1113	15.2746	16.4933	28.019
CD44	48.2283	68.2404	32.549	54.7719	48.0149	23.5452	40.8355	40.5605	41.8162	51.762	57.6103	25.4433	26.3123	32.0328	31.6517	47.2461	31.5739	25.0423	34.9124	30.3421	55.5354	28.2933	53.1368	26.9157	51.4347	44.3063	17.3047	19.2236	35.503	44.6936	18.6478	6.38408	83.1191	26.3657	36.2225	22.4973	20.6273	43.9293	21.258	30.6542	29.7986	54.4606	8.74751	45.0935	61.5035	32.4125	69.5975	67.7412	19.5282
LINC00336	0.0287931	0.034558	0.108863	0.0468841	0.151348	0.0356437	0.294554	0.142234	0	0.0417261	0.122591	0.0143382	0.0313876	0.138997	0.0128086	0.0842582	0.00825203	0.0352424	0.16452	0.171799	0.0494011	0.153423	0.147128	0.054444	0.0787821	0	0.0376274	0.0342633	0.0751656	0.105436	0.118995	0.0864763	0.0412788	0.126057	0.0449721	0	0.0272332	0.200323	0.029399	0.0250585	0	0.0775687	0.115852	0.169813	0.0213099	0.0386227	0.126127	0.0186346	0.275114
BRD4	9.19728	9.43916	14.3584	8.5772	9.34723	6.79201	7.13363	8.37096	8.78801	5.5204	10.1867	6.23173	9.73257	8.53883	9.71007	8.74309	7.80712	6.79331	7.71511	7.39647	9.39488	8.16951	7.5229	9.62687	7.51065	10.7681	6.95492	8.11594	10.8749	10.1184	10.9199	10.3548	6.32332	7.88484	8.27441	6.32914	10.6935	8.03928	7.79404	10.5556	9.39234	10.3552	7.08704	8.70745	10.0768	8.55748	5.60702	6.81658	8.23728
PRDX6	80.8722	74.0135	56.2048	72.4018	108.416	81.4682	65.5208	142.844	65.4087	89.7368	63.5381	37.0709	80.4203	70.5772	65.0808	67.986	68.8796	90.14	70.1852	62.4559	67.1347	88.6236	74.887	53.2615	79.0406	44.4901	75.1038	36.8055	56.6804	74.117	101.891	34.9189	72.4383	67.8968	95.2465	130.407	61.4206	89.3545	45.7655	75.8553	111.419	67.6535	140.489	67.9615	76.2558	60.6581	61.8789	79.3473	75.5971
SESN2	11.5899	8.54731	2.92281	10.2943	6.63086	8.1561	5.95124	6.69525	5.56318	3.2972	7.18745	6.07187	3.66452	5.08185	4.62692	10.2371	9.35566	8.11444	7.6948	8.6171	6.85782	9.23935	4.37512	7.13785	8.80926	12.2472	5.97617	8.17996	7.23529	5.91895	3.2898	19.8933	5.50612	9.58929	13.1103	6.13718	8.61341	7.75323	5.54317	7.84406	4.77671	8.49135	7.46509	3.81835	6.85266	5.17695	6.38781	6.12313	10.8795
NF2	4.85674	8.22244	6.21421	5.90367	3.26155	5.57237	6.95355	8.52666	4.30708	5.94695	7.03989	3.77106	5.0515	3.95867	5.48789	3.66179	3.30038	3.07586	6.7854	5.25049	7.0239	7.74428	5.07585	3.41466	2.92862	3.81498	5.8051	6.52705	6.66242	6.53138	4.29035	5.09515	4.07579	4.51006	3.09576	6.04169	4.49492	3.1424	4.01553	4.35936	3.16459	5.63482	8.5384	4.08945	4.82814	7.51356	4.55886	5.654	6.50189
ARNTL	1.35898	1.81872	3.75554	2.80277	2.82573	1.68976	2.18379	0.754278	2.12784	2.22864	1.61933	1.19028	2.35326	1.70179	1.48862	1.46638	1.8147	0.986248	1.80382	2.87389	2.0505	3.08333	1.9542	1.56177	2.56255	1.46046	3.60016	1.83004	1.63648	2.2658	2.01007	2.24845	2.22156	1.2801	1.40528	1.48736	2.83233	1.53298	1.74061	2.59046	0.921223	3.09087	1.25207	3.98171	1.64219	2.47626	2.76377	1.00697	0.948012
HIF1A	58.6922	58.8051	31.5884	84.7243	54.5909	52.7308	28.0332	12.301	58.9744	70.701	14.4711	30.6182	41.6112	38.0511	26.9406	52.1617	23.0983	11.845	67.9052	38.4258	38.4849	40.4156	34.4965	34.8814	27.8348	28.3852	41.858	19.4672	47.3684	36.948	54.1599	21.6836	72.8181	48.5641	39.9048	16.2859	41.5583	30.3924	22.6056	36.61	27.3194	50.7223	34.9114	38.0787	40.0011	54.9524	72.9841	58.3573	15.1532
JUN	135.204	58.0248	23.804	40.8627	36.6214	54.5227	62.7542	41.9114	83.0276	49.3187	54.8886	29.6815	89.5358	39.3868	48.456	98.1775	60.4371	56.8454	63.6393	108.083	97.2617	66.7738	61.5386	53.5561	50.6969	21.1673	84.4384	6.18431	56.3927	100.785	59.2375	30.7665	43.9688	104.872	26.968	63.725	50.3131	89.594	67.3155	42.0945	86.789	65.2548	25.7477	34.7789	51.7617	123.17	42.0806	63.9745	128.561
CA9	12.424	1.64231	0.13735	0.601385	183.556	25.1387	7.26748	1.37154	3.20898	9.11633	1.4307	1.26631	52.1678	57.3312	4.04009	22.348	45.2895	296.474	1.50489	1.64734	2.38925	0.2978	44.8725	18.9684	32.0723	34.8701	3.07222	0.432292	20.4961	0.438987	9.75868	0.422782	92.0679	14.2874	1.06388	10.689	81.7297	102.962	65.8531	95.1423	1.48933	7.88804	137.851	24.8957	13.2011	3.80089	49.0839	2.2688	244.335
TMBIM4	8.81824	13.8869	12.6621	11.0676	15.3189	9.75452	13.7267	8.55317	16.0097	8.73076	11.0512	5.46595	8.87751	10.8194	8.21311	13.2316	9.64965	12.3909	13.8967	13.7897	10.0641	11.3663	8.30261	6.54	13.6824	20.3166	15.5145	10.2522	7.92922	11.1265	12.5732	11.1649	7.42973	11.7061	8.32581	14.9337	10.6106	15.5662	9.79838	11.3713	9.31341	11.2672	19.7841	6.65515	10.9401	13.8679	17.0324	8.61757	12.88
PLIN2	80.2014	8.79511	11.9512	12.4727	7.5783	13.2798	7.1521	15.7411	10.74	13.947	6.98312	7.34772	5.27059	15.9937	9.46111	17.0613	27.2018	9.12014	13.9618	9.5157	14.8239	28.2203	6.60307	12.07	8.87194	1.99577	19.3337	0.805533	10.311	20.7914	20.9208	2.73613	10.5101	13.6431	4.99305	14.0541	12.6735	11.6461	9.34148	6.22174	6.3745	15.2318	23.3829	21.9876	9.26071	6.03748	20.0095	13.7799	2.64768
MIR212	0	0	0	0	0	0	0	0	0	0	0	0	0	0	0	0	0	0	0	0	0	0	0	0	0	0	0	0	0	0	0	0	0	0	0	0	0	0	0	0	0	0	0	0	0	0	0	0	0
AIFM2	7.85264	4.91097	3.2664	4.58816	6.28052	3.39796	3.76015	7.67872	4.54919	3.54407	8.28302	2.06503	4.91549	3.93056	4.86674	10.7599	6.3284	5.50471	4.61065	4.9486	3.18244	7.36062	4.89398	4.78066	5.58701	2.61438	3.75397	8.62166	3.87067	5.10932	3.20751	3.60597	4.11583	6.0474	4.15654	5.06012	4.04884	10.1963	3.31492	4.66805	5.46392	4.77421	9.11275	3.70686	5.49991	6.24928	3.81933	5.11911	7.64581
LAMP2	35.336	44.102	16.0117	57.4487	34.5282	36.6809	23.9907	16.3433	39.312	40.9382	25.3773	26.6735	28.2838	26.4725	20.8635	32.1981	22.7422	16.3893	46.9153	33.1587	34.9723	27.5257	22.5403	27.9325	28.4241	55.7803	33.9202	33.4411	31.8446	18.754	24.7031	35.2599	39.1842	30.4367	30.4494	47.0174	30.4623	25.7112	32.7272	18.5517	26.0419	48.5638	53.4184	27.1875	33.3946	33.8265	45.1426	51.0932	19.8136
ZFP36	531.042	45.8739	85.1736	73.335	108.116	140.264	341.55	109.076	304.236	156.093	88.9698	45.0904	151.351	125.95	113.107	222.469	119.746	103.896	225.826	280.112	183.777	326.342	74.0913	326.888	128.157	70.8878	272.181	48.7211	91.6461	312.684	356.568	110.604	139.324	347.508	130.525	95.0972	131.499	211.61	52.3038	169.173	212.964	149.338	66.3078	44.1103	79.2114	354.568	107.615	366.153	150.274
PROM2	7.2711	7.61004	0.297925	6.20494	39.6856	5.47085	12.1129	26.4303	12.6026	3.59372	34.3164	4.21543	31.0362	17.961	3.51202	21.8991	24.0545	27.3932	4.60246	22.532	19.3538	1.71435	28.2577	8.89251	71.5506	0.078931	11.5482	0.133955	19.8163	7.49673	3.29869	0.811405	24.3437	14.0183	1.94576	1.90192	9.8331	24.2627	11.222	15.5936	29.241	31.9866	5.87805	34.6731	8.54601	21.1755	38.3983	22.7076	25.8911
CHMP5	24.0722	24.5455	24.329	26.2324	20.0052	32.0621	23.3997	45.6427	51.5253	43.5293	35.0253	15.1495	21.5742	38.1401	23.2727	37.0993	26.0442	37.2832	29.0222	27.7165	22.1097	26.6038	17.9255	28.5584	30.1023	47.9191	31.0774	47.4614	26.1748	19.0178	30.3418	24.8341	27.497	29.4126	23.3322	20.2978	38.4536	36.4474	30.0906	27.3859	27.8606	26.6833	29.5576	29.8138	31.2984	27.5346	39.1117	25.1432	57.9013
CHMP6	11.4861	14.015	12.0345	11.87	8.24077	6.26435	8.57911	14.0282	9.61781	5.72137	11.5247	4.07943	9.49228	14.3806	10.1427	10.9898	14.5877	16.5714	5.81011	13.6555	7.60102	8.9932	10.626	12.4261	4.65013	10.905	9.02112	18.3294	13.1885	15.4186	5.53641	15.9043	9.83904	12.2895	8.27662	15.5852	14.3406	8.70199	8.28839	13.8934	7.74632	11.7138	9.98067	9.89935	12.0411	11.4882	10.9474	5.12571	13.0632
CAV1	41.8863	13.6578	53.7823	18.9164	64.0489	21.348	37.0555	86.1283	31.4029	50.8289	29.9039	9.44729	25.9869	23.7419	61.301	10.1722	18.6862	8.38605	51.2321	14.3125	30.2422	46.8451	17.6542	21.6668	18.6991	6.738	29.1387	6.99025	18.2545	29.8944	30.1533	19.6679	103.168	19.3194	10.649	6.08949	15.6172	5.30295	21.4693	4.97113	19.0275	25.2082	25.9588	79.2549	32.0745	50.5373	25.875	34.9059	11.8138
GCH1	5.34511	5.22272	11.1442	6.2152	2.22607	11.8001	4.66188	3.48186	7.6304	5.67045	3.16565	7.22249	2.83121	5.35914	2.69787	6.88497	3.40552	4.27769	20.1689	9.71498	4.6089	23.0294	2.20602	6.49175	6.82501	29.4122	21.9187	8.94153	4.10559	6.70752	10.7314	41.7464	3.33633	7.77037	5.19377	2.92423	5.95645	5.14906	3.07304	3.68568	4.05149	5.30575	10.9601	1.89143	3.3169	10.5158	5.83998	3.24642	4.46501
PTGS2	8.95401	0.446823	0.408119	0.340594	0.685916	1.82919	3.14756	1.05629	20.9392	21.8388	10.5562	1.52515	9.98679	3.53879	2.27929	2.29866	2.01952	1.96362	3.0888	7.44022	7.1282	5.45558	1.72973	0.95172	3.8461	0.157749	2.85457	0.0856338	5.4968	1.84671	11.9291	0.899097	21.2806	2.09616	5.69184	4.39154	10.9555	16.9635	1.53301	0.591213	3.10554	2.87233	0.472541	3.64994	1.72987	14.0598	6.91228	14.5271	0.630467
DUSP1	473.797	60.3836	87.1939	88.7791	106.634	207.3	43.5986	134.311	224.015	346.413	46.9519	63.5635	205.564	114.678	136.062	92.1611	86.5476	61.3955	263.141	214.858	243.68	365.519	43.4111	201.059	98.8715	58.3961	264.259	31.4927	100.749	231.198	172.957	85.0225	104.628	271.599	22.9029	64.9342	99.2053	44.2298	53.8563	59.214	137.323	154.727	88.0405	50.5326	82.3498	430.885	100.337	282.202	47.2068
NOS2	0.145275	0.401034	0.212841	0.275979	0.17818	0.251777	0.0825652	0.0461341	0.361756	0.410531	0.0515444	0.300225	0.137251	0.140262	0.407143	0.146432	2.98527	0.0829805	0.136964	0.364061	0.0830844	0.303683	0.277138	0.278621	0.235185	0.265383	0.325456	0.129657	0.222808	0.409623	1.08532	0.152711	0.195776	0.143105	0.113453	0.160011	0.178626	0.630501	0.243265	0.155934	0.188081	0.180031	0.151978	0.085679	0.0537594	0.155896	0.378641	0.159835	0.149486
NCF2	33.0547	31.7731	17.724	38.3545	12.7716	14.0388	9.67962	11.3538	14.6203	11.2749	3.82274	15.4664	8.89161	20.8048	14.1299	16.4314	23.0105	13.4749	15.7576	12.9809	12.6496	8.50958	12.1332	11.7087	10.2565	1.63442	7.99927	1.15883	15.9429	13.7404	4.70303	1.73462	5.16857	16.1239	4.57923	8.9981	5.09524	4.69527	4.4596	17.4912	11.6389	8.71888	8.97034	14.9142	12.6051	7.18913	4.4246	2.56122	3.26656
MT3	0.242183	0.0132124	0.0780395	0.0448126	0.127302	0.0272551	0.056308	0.256362	0.0259696	0.287154	0	0.0493369	0.120003	0.0664278	0.161604	0.150333	0.113579	0.0404222	0.179265	0.03941	0.0661057	0.108291	0.112502	0.0356835	0.0753012	5.22393	0.406917	3.07517	0.0538833	0.14512	3.42263	0.111585	0.975326	0.156634	0.025791	0.114321	0.0312359	0.207883	0.026976	0.105386	0	0.32029	0.159456	0.720655	0.12221	0.25103	0.0361661	0.160301	0.0485462
UBC	154.267	128.778	117.048	156.844	218.075	206.082	243.575	206.44	254.939	114.715	232.992	83.7612	152.553	228.61	263.875	147.964	192.493	183.423	164.557	159.855	147.859	235.452	144.894	253.949	155.735	164.926	135.018	186.848	146.774	189.383	202.829	122.9	134.514	173.009	178.987	121.093	135.713	218.083	178.473	162.373	198.652	139.077	108.843	214.898	247.629	199.952	122.3	249.358	383.765
ALB	0.311389	61.8317	0.101884	6.48912	7.95102	2.35734	2.60356	0.139454	1.06893	0.21695	48.6909	125.15	0.0587507	0.065043	0.0239749	1.09231	8.35627	0.0219886	0.215561	2.06877	2.55315	0.198813	15.0731	1.82947	0.147463	0.663805	0.204583	0.587889	1.26624	3.86812	0.0913776	4.81547	0.973537	2.42506	3.39517	27.2721	1.40463	0.148794	4.43162	11.0381	0.10337	7.70482	5.45015	0.100653	23.6931	0.257042	2.47885	0.0290666	28.5931
TXNRD1	13.2223	10.4025	10.5531	13.5041	13.3584	19.0254	20.0872	10.901	12.5073	17.6782	8.88209	11.0475	10.8054	12.8067	16.278	13.1211	9.00714	6.73039	18.8256	15.1851	12.6153	16.5701	6.02314	10.9446	16.0641	14.7527	24.4955	22.3746	7.10357	11.0017	15.6206	9.2488	10.8186	15.5443	13.5855	4.51391	12.5231	12.4975	16.2302	15.5451	9.79638	16.1927	7.11413	23.4957	11.5262	16.7617	32.1232	19.4413	13.0917
SRXN1	0.389756	0.242893	0.10627	0.305117	0.228511	0.352588	0.626198	0.460178	0.306489	0.3856	0.406884	0.319126	0.433048	0.597023	0.330095	0.445987	0.341554	0.155961	0.546046	0.751332	0.398657	0.396313	0.551518	0.528437	0.671646	0.504119	1.02428	0.3813	0.183439	0.214084	0.643356	0.911703	0.38684	0.303537	0.359989	0.198134	0.404087	0.670465	0.468365	0.326157	0.177903	0.496733	0.289518	0.822213	0.332838	0.542922	0.743662	0.822226	0.338802
GPX2	128.646	59.5366	0.34429	45.4274	115.473	198.667	201.263	12.1097	129.571	84.1339	120.692	38.0504	73.7074	146.906	202.183	438.191	196.987	600.32	33.2652	136.823	74.5537	115.788	50.0052	71.2026	276.186	18.2142	43.0896	164.661	128.157	47.4985	98.7479	6.89804	56.1766	349.235	324.314	56.3197	175.841	544.001	85.0764	541.649	310.596	143.441	900.548	14.2259	74.7033	86.3725	453.696	1.49299	590.999
BNIP3	5.11086	8.34747	2.88078	5.2582	7.02213	3.228	3.41449	2.22586	3.33001	6.25473	1.54543	14.0675	5.51228	2.63341	3.49666	2.84064	3.0204	1.52178	6.22197	5.04847	6.21336	7.22339	11.3502	2.94146	2.36017	20.1259	6.45857	19.5414	5.16259	3.23124	4.03474	7.17526	11.9615	4.38835	1.11921	7.11751	3.21213	1.26474	4.49337	4.72393	1.55742	8.94909	15.35	8.13473	6.91052	3.18438	5.83638	9.39658	1.86289
OXSR1	11.1281	7.17151	9.60916	8.87573	10.8449	8.64953	6.20343	12.7028	12.6824	13.1501	10.6296	6.1192	8.06305	11.5098	9.35577	17.1703	12.2897	8.33619	10.3365	8.77692	8.2985	8.44022	7.44678	8.84797	14.3269	4.64358	7.72023	9.21869	8.97126	7.07235	18.4356	6.30221	18.4458	6.71476	15.8044	4.15773	12.4615	11.1529	6.71336	12.0545	8.71979	10.3201	3.59219	12.2887	7.76786	7.16215	9.55163	18.5684	9.29594
SELENOS	18.4342	16.1894	9.09029	14.3088	19.5546	19.2373	32.5841	28.8808	20.437	14.5633	26.7376	9.07682	16.63	15.9226	10.1258	29.3529	26.3529	28.1301	14.1842	13.7641	14.1373	16.1043	18.7459	23.833	13.9651	14.2657	14.8054	26.1761	17.8728	16.9712	20.6333	14.0428	17.9584	22.8506	18.3046	25.2003	26.5926	21.8923	36.1562	16.9779	22.837	15.5018	35.928	16.8162	17.1325	20.7154	21.1943	18.5421	25.2371
ANGPTL7	2.71077	0.737465	0.204981	0.853369	0.0569956	3.78079	6.67092	1.46343	0.97345	0.320817	0.365482	0.931426	1.47752	1.70119	2.44795	0.564097	0.062152	0.475573	8.04651	0.404358	0.999953	3.86661	0.0184688	1.90384	0.0123618	0	5.64269	0.00806443	0.681121	0.188602	0.939328	0.0101768	0	2.37357	0.0211698	0.0341226	0.256391	0	1.51676	0.927942	2.88559	0.56962	3.99199	0.0239809	1.22381	8.31475	0.391854	1.37719	0.0298858
CHAC1	0.756617	2.59459	0.278637	1.73601	0.88839	1.33805	2.4628	9.57975	1.63811	0.185118	3.24234	2.40011	2.0245	0.901275	1.50806	4.59118	4.62133	1.79205	0.934823	2.28657	1.41617	1.99365	1.32556	1.14666	3.93879	3.81848	1.22174	0.526186	1.22166	1.43569	0.5248	1.4055	1.57213	3.64591	6.14672	5.77944	1.5149	5.16637	1.36649	0.752551	4.11329	2.22363	1.70799	1.0866	1.59266	3.47972	5.06833	0.419722	2.56748
DDIT4	93.1425	67.2472	94.7504	97.4008	257.643	66.5013	95.4629	113.137	117.442	78.9956	156.804	40.0826	92.4415	122.36	49.4907	266.844	79.9566	72.4275	46.8422	336.108	40.2427	59.1451	124.883	255.895	72.7803	108.766	87.7617	24.4326	74.5311	123.059	148.734	24.3804	219.059	134.769	53.1795	72.5074	222.077	305.978	40.0677	119.425	71.2194	158.847	73.4791	129.975	110.439	59.7615	63.0152	711.992	140.919
ASNS	3.57692	6.07463	10.9731	5.50652	5.16333	6.82177	7.37569	6.51556	5.80755	2.88123	9.4845	8.43591	4.52767	3.91147	6.53038	4.96797	7.60267	4.10031	5.63343	4.83454	4.09655	7.40687	6.22086	6.01432	5.10154	23.2368	6.71671	8.305	3.19503	5.21101	4.84	16.6715	4.33799	6.43885	15.1067	2.90553	5.3409	12.0008	5.54225	4.85515	4.28023	3.91809	7.19972	13.0951	4.54542	9.43777	6.30817	7.65873	4.68917
TSC22D3	56.7506	39.0601	110.614	86.2864	46.2791	83.7786	70.7743	55.2043	56.5547	19.3075	28.8595	30.3469	19.5284	53.3379	82.0619	33.5785	63.3827	30.7711	83.5659	95.6751	46.9882	95.5991	27.7911	102.132	49.2508	56.4204	71.6956	8.72872	43.8012	237.312	28.3833	55.2762	45.2464	58.0042	24.3004	17.0086	106.955	18.8718	26.1187	32.1302	31.4032	109.783	58.6947	69.945	61.3675	29.3912	18.3866	32.3719	30.5841
DDIT3	11.1654	13.5735	10.5084	17.3485	25.4407	14.5536	19.3639	38.9911	19.0046	10.4514	20.7428	7.26629	12.2238	14.2848	11.6819	26.9398	41.4899	43.482	11.7327	14.5536	16.2929	16.2633	8.73352	29.7463	11.8988	57.0395	14.6181	14.3416	9.69508	12.5115	20.9774	17.8643	28.6755	25.3504	110.38	45.4369	30.7599	38.4517	7.54479	20.6717	39.4644	11.5929	59.2319	28.3749	13.4061	14.5915	11.4087	19.461	15.2507
JDP2	6.07805	4.71801	9.48673	5.95719	3.43696	5.57689	7.88571	4.88206	4.21844	4.41817	8.33379	3.69214	4.76601	4.93592	4.70934	5.78011	7.40378	3.95395	6.01273	4.94059	6.28814	6.9833	3.46708	6.26594	7.51876	8.30959	4.36686	0.879976	4.91823	7.5037	3.72736	10.144	3.43155	6.05611	5.31911	1.96581	4.47876	7.09188	3.93816	2.98922	4.40897	5.93459	3.51175	5.39419	5.22091	7.33076	4.20253	1.81989	6.80824
SLC1A4	4.28693	7.44333	4.30964	5.72057	1.98225	5.37185	3.02109	4.82172	3.02274	3.7313	3.77827	4.94585	2.78615	2.68359	3.37979	3.47951	3.18724	3.5742	5.96721	4.35588	4.17513	4.38628	4.33644	4.30769	4.93588	11.2488	4.43633	18.0222	3.67747	4.4117	8.4272	4.29321	2.6798	3.41939	3.00423	3.07601	2.67372	6.22754	3.34758	2.16093	6.31979	3.8345	2.87052	1.14728	5.32535	3.52219	3.74935	1.6975	3.02984
PCK2	10.2922	9.79194	11.6699	7.93533	4.51172	5.50396	6.73288	4.65019	7.17471	5.03002	26.4219	9.4656	3.81004	6.90394	7.08679	14.1268	11.6176	14.3229	5.97874	8.21781	6.98228	8.08496	8.44622	6.75222	12.4624	11.0875	5.96169	7.42781	6.28543	7.85414	4.41529	16.8385	4.91658	10.3931	7.2102	6.13448	10.4423	20.4205	8.01762	9.33959	6.76033	8.79416	9.2011	9.02816	7.71733	5.93158	8.355	10.1227	14.5244
TXNIP	208.443	130.663	971.422	233.364	208.588	445.525	192.009	84.0836	320.441	88.8748	417.18	217.041	100.681	372.668	409.381	244.366	544.61	181.86	354.594	318.114	362.04	375.992	88.0768	375.803	568.176	223.67	415.576	85.2323	180.994	885.202	360.765	91.8002	226.465	204.496	94.9522	109.072	304.023	284.214	230.967	319.897	432.954	475.298	95.9431	141.243	163.621	155.243	357.173	348.732	221.534
VLDLR	2.21517	3.76323	1.78987	2.21778	2.27641	1.90588	2.3887	1.41424	1.85941	2.00203	0.951901	3.43545	1.45642	2.20301	1.87259	1.51444	0.752153	0.951486	6.27104	2.87213	2.29226	3.10995	1.81903	1.53716	0.75985	7.27381	1.94404	5.53679	2.10495	1.01574	1.10485	5.10679	2.79577	1.84861	0.687411	1.92368	1.33943	1.40967	1.0891	1.26451	0.901759	1.96356	1.8793	1.88878	1.71157	3.07596	1.77137	0.91862	0.916717
GPT2	2.45698	4.2362	2.6217	2.24393	2.75361	4.28261	3.52172	4.86811	2.5177	1.48511	2.88625	18.4264	1.45715	5.90743	4.23038	4.309	4.91729	4.80703	2.99507	2.42118	4.94449	3.83913	11.0521	3.02529	5.22704	8.68117	3.28867	9.02978	3.69203	2.12224	1.35375	0.946299	2.45839	3.9049	2.84835	12.1298	3.39851	8.5375	8.69004	10.301	2.75379	5.07751	4.07986	6.82762	8.11222	4.44415	10.6274	5.33271	6.62108
PSAT1	2.07029	3.99344	4.78299	3.19801	0.631563	3.11206	1.15036	9.42147	5.16017	3.64311	17.2259	21.077	3.00241	1.87392	1.0731	1.9293	2.69388	2.62452	2.55863	4.15252	7.76221	3.7504	6.53624	4.18679	11.8983	29.9761	1.38726	0.536166	1.27575	2.68047	4.10761	1.2283	3.36291	2.83245	6.29037	2.53915	1.41615	10.2883	6.50578	1.81786	0.897426	2.85343	2.81139	14.7337	3.85794	12.8439	7.0263	2.91602	2.99574
LURAP1L	6.07998	10.8606	3.61759	9.28231	13.6411	10.4268	11.3044	6.31543	17.625	8.81093	4.45239	5.37754	9.33689	7.86428	16.1142	9.49279	6.71994	14.3148	8.30837	9.55888	11.8312	7.05634	6.70792	8.82411	12.9764	3.26064	6.97507	2.53115	14.5783	6.70004	8.26818	3.93126	7.5144	9.23962	10.3001	9.73386	17.2966	15.9793	8.36181	6.73599	11.8911	17.095	14.4262	7.50162	14.2576	7.93931	17.3198	17.4032	8.45991
SLC7A5	12.6022	11.7443	7.66795	13.8653	11.5146	10.2351	28.0484	32.5808	34.4014	13.9827	26.397	12.0078	17.106	10.8989	8.06505	12.2096	8.46449	8.20021	10.2934	14.4487	10.6026	18.3838	19.8173	15.6624	8.80112	23.839	9.60013	1.27041	9.938	22.2154	11.6084	1.84797	14.2898	5.90539	7.35883	6.9446	13.0763	6.40035	6.19828	6.00495	10.6213	7.17126	17.6297	87.6806	19.3036	22.9127	5.34577	66.3708	7.55065
HERPUD1	18.5708	23.1837	30.4182	30.3764	26.4845	39.4276	30.2187	20.5716	31.3383	26.3665	14.6937	45.7437	17.6314	21.1294	19.5694	18.0765	33.1348	17.2519	31.6585	28.7408	39.8483	31.1275	29.5105	40.3889	17.2354	52.7443	27.1821	34.3563	26.2484	49.8391	21.0523	17.8494	22.8985	28.2004	78.5621	21.3508	25.3008	13.4981	26.527	22.0138	24.725	26.7143	41.632	22.5019	26.3563	22.1428	37.8389	15.9033	19.9681
ATF3	47.0369	7.58176	1.54004	7.24993	2.69952	9.38767	4.25016	13.3471	18.8935	10.0031	5.0509	4.66245	9.36349	7.0015	6.53318	12.7632	23.3305	21.7069	22.6433	10.286	21.977	18.4712	3.55527	20.9632	9.08036	1.77683	16.2094	1.20619	4.72377	24.5744	11.5002	4.16051	5.86432	38.0215	59.9966	31.9076	5.41609	9.05452	5.09655	6.68256	39.0121	5.59894	5.23244	2.23179	6.63495	28.5897	13.7413	31.7506	6.68845
ZNF419	0.613639	0.885016	2.72109	1.08143	0.791121	0.612715	1.03765	1.03182	1.05246	0.455613	1.20688	0.447047	0.944217	1.1002	0.859376	1.106	0.920592	0.853087	1.30727	1.34703	1.04851	1.3197	0.985844	0.912698	0.841232	1.53804	1.3139	2.00811	0.788606	1.12076	1.69069	2.36062	2.17219	1.48423	2.15059	0.512575	0.840737	1.31517	0.696169	1.1648	1.53114	1.5511	1.00286	0.667962	0.80739	1.15509	0.970672	0.992854	1.13868
KLHL24	4.63594	6.41715	9.30754	8.62607	5.74863	7.55354	4.1973	3.6106	8.46026	6.46079	6.91038	4.88259	4.14132	6.15077	7.12603	3.91779	4.0362	2.17187	8.33545	7.00946	7.74544	5.43034	2.40115	6.03027	9.61102	8.19388	7.74741	7.01063	5.2181	6.62352	5.70119	5.19496	6.1234	4.14269	3.48626	2.58896	4.74078	2.60939	8.01901	4.99702	8.23261	8.28333	3.65162	9.71632	4.99868	4.44364	7.80194	12.9092	3.61099
TRIB3	3.07398	8.37549	4.6673	5.67183	13.8056	4.33754	12.2997	6.94424	2.85255	2.02255	8.29908	3.07912	4.28181	2.21029	1.24958	3.13062	5.11383	4.44006	2.42771	5.9768	4.13241	4.90954	7.51075	5.51663	7.58912	31.5098	3.09697	2.42289	3.81638	2.45831	3.70114	8.98691	15.4345	4.46667	7.53993	21.4044	3.26948	6.85966	2.80315	2.47028	6.64561	6.99629	17.5647	19.411	5.88379	5.94023	2.20941	7.24892	3.12284
ZFP69B	0.398344	0.630687	1.20166	0.90394	0.302942	0.954767	0.303463	0.574182	0.74645	0.786068	0.613452	0.702719	0.378804	0.542119	0.588166	0.421632	0.313345	0.165981	1.47461	0.5765	1.23603	0.708679	0.372449	0.467041	0.57975	0.580596	0.645564	0.302568	0.67206	0.614507	0.412241	0.381822	0.648846	0.371057	0.327635	0.232044	0.280569	0.235865	1.55248	0.486824	0.731515	0.698684	0.286454	0.532344	0.395179	0.76171	0.801923	0.60063	0.345729
ATP6V1G2	0.339079	0.486104	2.32365	0.613475	0.316861	1.09603	0.562074	0.259227	0.674004	0.334414	0.150384	0.302528	0.68793	0.431957	0.66621	0.633944	0.210556	0.230572	1.89709	0.724974	0.864573	1.05395	0.317651	0.748015	0.251272	2.9915	1.59839	2.26128	0.331943	0.848468	0.781516	2.42927	0.259263	0.639162	0.121369	0.346797	0.365253	0.402542	0.357755	0.319692	0.264207	1.1114	0.35245	0.241641	0.334605	1.2887	0.612694	0.137156	0.353062
VEGFA	23.9246	9.63719	10.0533	9.21266	27.8975	6.67348	8.2883	6.14255	13.4921	16.1017	10.6215	4.64014	20.7003	20.592	7.52726	15.3982	9.04713	4.71677	14.0041	17.7541	8.80805	14.5827	15.3607	18.3442	16.9299	22.2219	7.71879	12.3552	9.72072	6.06839	14.407	12.3024	41.0397	18.4219	12.323	8.5053	21.8955	31.1144	7.65764	19.4422	16.9447	11.0921	9.47746	38.8936	5.77155	14.6015	10.3696	44.3917	8.25764
GDF15	7.39321	12.3624	1.07158	5.6879	4.25799	24.446	2.1312	16.6778	22.8206	3.47539	30.1267	2.09896	11.598	1.5904	5.90964	47.0318	26.0514	19.9249	1.36199	20.6053	19.0604	9.03146	12.8535	40.8631	9.68364	26.4666	6.34943	5.31846	5.41636	3.04437	14.8506	2.59732	9.56844	19.164	27.3553	316.206	25.313	108.335	2.38039	18.8981	44.3248	10.1336	130.226	1.9887	8.47654	7.88954	14.1469	62.4315	21.8675
TUBE1	1.13393	1.58722	2.48765	1.45918	1.10367	1.06626	0.939489	0.94245	2.18702	1.0717	1.03411	1.26943	1.0812	1.148	1.47072	1.19944	0.770485	0.578597	2.503	1.765	1.43551	2.12539	0.702421	1.4524	0.688368	2.08419	2.96425	3.0076	1.55864	1.68853	1.93611	2.10348	1.44188	1.99021	2.41205	1.52777	2.19164	1.21349	0.952295	1.79705	1.63326	2.3673	1.01519	0.964657	1.28782	1.70388	2.65825	1.56253	0.920825
ARRDC3	19.8534	23.5678	27.6316	26.3046	14.5894	19.2751	9.20331	5.05436	34.708	25.8429	17.5375	8.35169	11.3529	11.0058	15.9662	22.5443	12.5381	9.48137	20.3988	25.1934	22.826	17.7199	5.5541	24.5615	24.0434	18.3774	18.0355	2.76539	14.7974	22.9763	26.4084	22.3233	47.5733	22.3399	13.1696	12.4401	27.9032	33.3056	14.9247	20.774	18.9344	19.6164	5.32825	18.7128	12.8493	26.6807	23.0739	18.0559	4.07579
CEBPG	9.28824	7.91801	7.75456	7.70392	6.72338	11.1804	22.0742	8.70613	10.3178	12.457	14.2979	8.81799	11.2697	9.94261	9.43441	26.0491	20.5049	15.3079	10.7977	11.9648	8.91982	10.0626	8.55994	11.3016	20.5093	39.0172	11.0845	22.9581	6.37301	8.62224	14.6648	9.06174	14.942	11.4055	19.0758	6.30617	12.4014	22.4821	14.4558	13.047	15.0363	9.40384	8.96491	7.95326	9.48689	10.03	10.742	5.6211	15.4462
RGS4	14.159	2.04268	0.231224	7.98694	0.813272	8.7846	5.84636	1.96533	7.05004	13.9044	2.2878	4.1449	4.17096	5.5614	1.98669	2.01092	1.67902	2.67173	16.2677	3.3234	11.0201	9.07548	1.38888	3.15486	0.932486	28.2498	15.3143	0.432918	9.63637	5.59519	8.84957	36.6408	4.25161	6.42129	1.2883	2.14761	1.72441	0.818757	2.16982	0.73149	4.15957	1.28425	9.95379	3.85466	3.45384	6.48421	2.53055	1.51824	1.26319
BLOC1S5-TXNDC5	0.208225	0.0588038	0.060782	0.0398889	0.0128767	0.144047	0.0626516	0.149104	0.144477	0.0266253	0.0325938	0.0137238	0.0934658	0.0147823	0.0899048	0.0179217	0	0.0599683	0.0787347	0.0328874	0.11033	0.173206	0	0.0446665	0.0209461	0.0228837	0.14749	0.032795	0.0359723	0.168196	0.0525674	0.179336	0.0210719	0.100546	0.0430449	0.0925094	0.0289624	0.0182608	0.0562783	0.0266497	0.0264294	0.0296979	0.125672	0.0270893	0.149576	0.460041	0.0603608	0.0832349	0.00675192
EIF2S1	10.1094	9.5221	9.76188	10.4507	8.54363	11.3407	14.4055	12.3907	11.6416	16.4705	13.3431	8.59647	8.87088	11.501	10.1628	12.8701	10.5996	11.4452	15.1361	8.71163	10.4991	12.2857	13.9959	8.42436	13.2502	8.98559	10.0973	6.59521	8.34469	7.9686	10.034	6.0617	13.5841	12.4748	10.0189	7.04407	8.72568	11.2001	12.2835	9.34629	11.0573	8.10389	9.9221	11.8938	10.1543	11.0117	11.0395	15.091	9.04261
IL6	19.9193	0.199426	1.98166	0.469494	0.328806	6.29172	0.2833	6.54912	2.13667	6.38095	0.291299	0.642468	1.03351	0.389263	0.860896	0.629242	0.218493	0.502455	7.86606	1.38214	2.52381	34.4811	0.249717	0.918785	0.615089	0.0608683	4.36831	0.209355	0.258343	16.2025	1.54739	0.638468	0.689406	3.77629	0.332036	1.39335	0.194133	0.194287	0.179633	0.365769	1.91917	0.679342	0.389333	0.440976	1.36718	13.622	3.75053	6.4806	0.118532
CXCL2	17.6878	30.2905	2.12171	11.8871	3.08969	10.898	1.31021	2.9826	12.552	8.51816	1.16235	3.59506	9.28811	7.97249	6.29715	3.26133	1.02004	3.79529	8.05366	6.05715	22.2055	31.4144	5.04265	1.89004	2.47146	0.0839576	4.37178	0.22861	3.36544	17.1058	4.12729	1.65503	3.61814	18.8726	3.90079	13.466	4.92195	3.69822	1.52794	7.18057	14.0213	5.60045	17.1847	0.858709	6.43565	15.4076	68.9794	9.20065	4.0428
RELA	19.7893	20.6999	19.4258	16.4973	21.8274	16.1959	18.9749	15.2829	17.4474	15.2535	29.522	11.5612	20.2533	27.099	22.5129	23.8377	25.8291	25.454	14.5249	17.6419	16.8718	20.2835	17.2739	21.5463	20.3872	7.24642	15.4508	13.8631	20.4634	20.3614	25.4563	12.0256	22.444	19.4276	25.6747	20.1608	22.3787	30.8953	19.787	16.2048	17.9283	20.645	14.6934	20.1195	22.8608	18.8601	14.4814	23.3502	27.4156
HSD17B11	28.6351	26.6834	21.6775	27.9518	28.3051	48.2273	30.4154	12.6503	65.9396	41.5153	60.8002	22.7169	21.8816	44.8121	37.2731	70.2918	62.3434	38.1799	37.9456	35.1278	30.6707	20.8326	25.1819	32.459	136.8	26.1182	32.0519	28.4917	25.4309	33.4827	31.1434	15.1059	23.6671	40.3767	48.2731	65.6642	54.4268	56.1948	73.4928	45.6212	30.1233	50.7964	23.5278	20.1306	27.8619	24.9202	55.9272	19.2768	44.9468
AGPAT3	5.7466	10.3286	8.17814	9.68667	7.6749	6.74157	6.36718	7.8094	7.01627	4.36238	8.58063	4.02906	5.97756	8.90147	7.63093	7.18412	6.41239	5.66427	6.08067	7.70684	6.90635	6.65905	6.61565	6.24256	6.16697	4.20085	7.83867	7.0317	7.63758	7.32187	9.88393	5.08098	4.67057	6.35635	7.76772	7.40274	7.6822	8.77731	8.2639	8.62834	6.80249	10.6836	10.8069	7.66999	8.70491	5.81134	9.3339	3.6757	9.51518
SETD1B	4.17386	5.65473	11.5494	5.22599	3.15796	4.72733	4.54111	3.96507	5.00358	2.44096	4.62395	4.27869	4.39354	5.16938	8.51443	4.22797	4.13867	3.13194	5.49316	5.84725	6.03029	6.06853	3.60684	4.52562	6.58532	7.08601	6.83448	13.2073	5.59804	6.66942	5.85968	11.3358	3.4773	5.09279	4.33663	2.29173	5.79048	7.06391	6.44768	6.24892	4.48735	9.5263	2.54552	7.70762	4.79566	5.89241	6.82591	5.12158	5.19158
TF	0.88303	0.0850132	1.27876	0.109569	0.12907	0.175368	0.0362304	1.29462	0.15967	0.0102647	2.50307	0.409157	0.0746401	0.0569891	0.270981	0.0944258	0.300441	0.407474	2.65091	0.308519	0.119502	4.5581	0.0361937	0.185593	0.0339159	0.0676366	0.429761	0.0547873	0.0739633	2.11909	0.058546	0.164868	0.13201	0.320439	0.135524	1.36417	0.171951	0.0844793	0.23143	0.127398	0.193593	0.179371	0.484495	0.035508	0.204448	0.202693	0.108595	43.3155	1.38481
FTL	9110.75	3446.38	3346.2	4707.9	3776.49	3561.72	2105.12	4502.96	2359.52	3120.18	2065.86	2461.56	3441.09	3694.39	3639.72	2538	7073.11	7085.92	2707.31	3153.52	2299.05	3202.26	2496.35	4462.12	3112.89	1268.89	2521.33	1322.08	3682.55	5081.5	3880.39	1795.75	2666.75	4917.84	8760.11	1803.46	2270.44	2265.81	2144.69	4033.24	2899.08	2142.85	4911.86	3665.18	2426.08	2191.06	1601.53	1867.64	4106.11
RPL8	630.002	486.313	744.987	400.653	763.851	563.822	441.938	1047.42	505.161	645.341	1117.09	269.88	602.034	456.019	430.455	504.638	614.022	1112.28	327.336	532.593	517.813	564.208	870.333	508.905	913.627	295.458	477.443	457.817	520.803	1117.08	706.012	496.086	660.627	577.154	935.777	837.273	483.839	958.069	394.959	837.795	496.253	368.555	1531.44	624.7	678.655	707.135	378.916	1213.57	1564.38
ATP5MC3	18.7877	14.8993	12.6316	18.0668	17.9482	21.803	22.6505	32.4124	16.1272	18.2144	18.9153	9.77834	20.7375	11.9148	21.017	25.3817	24.4726	37.69	15.8827	15.483	13.1108	14.5163	25.2084	15.9453	23.2608	11.3529	20.0124	20.7953	14.4388	19.7972	17.6024	8.35445	16.4533	24.6603	17.4558	22.099	17.7219	23.6564	13.2493	19.6008	20.7748	12.2313	29.7961	15.8844	16.6156	17.7639	28.1015	28.1617	23.7417
TFRC	18.2942	4.91149	9.81171	7.59434	9.69839	11.4298	9.19796	12.4252	11.5409	9.98033	7.60346	11.2902	12.2675	9.67002	11.1756	14.2535	13.0485	11.2791	23.7358	10.6387	9.12603	16.0163	7.3186	10.2249	20.245	5.6685	25.8052	6.80783	6.27512	7.83608	12.4125	10.1822	16.0231	13.9475	22.4576	5.31332	9.12808	14.6149	6.62711	13.44	14.3679	5.92659	7.75289	9.90323	8.03837	11.4426	15.2973	29.9265	8.03089
MAFG	8.34074	6.3468	7.00315	8.6074	6.37374	8.72346	7.42427	8.80853	9.25183	8.67379	11.6861	5.62253	6.0517	8.4765	12.7029	7.16098	5.38265	3.41405	10.6251	8.3214	7.58062	12.6142	4.24022	8.19382	5.10914	7.53689	10.5751	7.0464	8.0666	6.20073	9.39934	11.5056	11.5266	7.89515	8.90381	7.24165	8.18933	5.82949	5.35421	8.49965	5.4251	7.23256	7.35106	11.8031	5.67699	10.9907	6.68698	14.4867	4.67252
IL33	9.29369	5.096	6.90131	5.90138	1.6469	35.7307	3.83691	2.53347	5.77812	1.31979	3.36141	4.98247	0.697999	2.07069	19.04	2.48619	1.36295	0.608715	28.7022	8.01188	14.1856	17.2222	0.984729	11.3348	4.02696	1.30079	17.3387	2.39126	1.39971	12.5452	1.9565	1.64534	0.294104	9.12422	2.35944	1.37333	2.71644	2.10073	3.69415	1.76373	3.68878	4.0495	2.62635	0.560946	5.2864	18.4453	22.0858	1.59925	3.23491
HAMP	2.32456	5.0881	0.114306	1.87068	1.15832	1.66337	1.68387	2.15484	0.364532	0.116833	0.178779	0.80294	0.0805616	0.997305	1.4794	0.484953	2.11417	5.44377	0.708256	0.925998	0.662798	0.355233	0.52868	1.48632	0.0321694	0.0753108	1.01218	0.0359765	0.808969	1.25469	0.986746	0.0529667	0.439207	2.38984	0.661089	1.68082	0.37491	0.220355	0.666768	0.900436	0.898791	0.532121	0.44603	0.208021	3.32647	0.234311	0.0750452	0.0847874	0.94068
STEAP3	7.70416	9.57656	0.861032	8.66875	19.4839	27.1465	11.7677	14.6915	4.31886	16.1656	16.1744	5.99974	10.4811	5.91148	6.0341	10.2002	5.5454	13.9277	6.18896	9.06143	8.44585	6.06668	39.4215	6.45878	18.3659	3.91999	4.70959	0.249241	5.12927	4.02721	11.6429	1.17823	32.849	11.3094	11.912	5.56595	4.81313	16.0634	8.82581	15.2963	11.7361	9.37919	10.4714	23.9524	10.5114	8.87749	5.04468	11.8512	15.536
DRD5	0.0173582	0	0.0123055	0.0211985	0.00912419	0.0322323	0.0591918	0.0367489	0.00682491	0	0	0.0194489	0.00946119	0	0.0231655	0.050796	0.00746224	0	0.0371934	0.0310713	0.0670096	0	0	0.0281333	0.00593684	0	0.00486088	0.007746	0.0254894	0	0	0.00977497	0	0.00949938	0	0	0.00820891	0.0086262	0	0.0151068	0	0	0.0209528	0	0	0.011642	0	0.00842556	0.0095686
DRD4	1.58821	0.542283	0.679425	0.401292	1.1371	0.0338981	1.14386	1.37684	0.915149	0.0694446	0.816111	0.0920431	2.43281	1.56976	0.749153	1.45573	1.62451	1.40769	0.0938775	1.20088	0.411091	0.639756	0.755583	2.24123	0.243503	0.289901	0.306726	0.73317	1.36714	1.09798	1.71057	0.370086	0.942174	1.16887	2.3256	0.607519	2.6288	2.85768	0.444551	2.46654	1.15217	0.840977	1.90058	0.884193	1.09438	0.550968	0.287879	2.44564	2.76233
MAP3K5	5.6171	8.26129	11.0351	7.90763	9.68157	12.0425	6.10522	6.45456	12.2407	11.7128	9.40067	8.50546	5.7907	5.7896	7.04339	11.2113	8.59679	3.19259	13.1127	5.86351	7.93305	8.08401	7.40069	11.094	13.4781	16.752	8.3828	7.5283	6.87267	7.15517	26.862	2.16461	9.48962	6.79074	14.9067	5.75305	9.92947	5.30618	9.67876	13.4709	7.96503	9.46166	2.82628	5.51908	19.2452	5.50908	8.86496	26.4543	6.40719
MAPK14	6.94516	7.47951	13.0695	10.3129	6.63503	9.89309	7.4437	7.15517	9.07761	9.1548	7.21995	5.63476	6.58766	8.66647	9.70144	8.83921	6.45804	4.28648	11.0941	10.6009	9.23542	8.8337	7.58277	8.88659	9.25348	5.24307	9.67981	9.26088	6.84805	7.68147	8.29933	5.66404	6.95796	8.37591	10.553	5.52989	9.06151	9.98506	9.12359	7.38868	9.83374	8.9676	5.51538	14.3118	7.50731	9.44664	11.6197	10.2164	4.59872
SLC2A1	60.905	7.23655	12.5231	5.79102	59.748	27.432	113.613	119.348	85.5457	158.924	134.156	14.7926	71.8294	96.0967	20.9954	143.329	99.1417	87.5485	13.853	106.868	18.0276	32.2046	56.7734	64.9419	72.6736	12.4224	8.94897	10.9088	33.5102	30.9401	54.9038	3.98008	311.11	38.2025	72.572	31.4681	57.5627	175.307	18.1041	30.248	24.9393	19.1534	5.84116	118.798	48.4175	17.2269	9.22865	220.023	51.5039
SLC2A3	50.8792	5.59985	7.68583	7.04384	4.13866	15.0837	7.98861	14.1214	21.2673	50.7269	5.25629	6.4208	24.4498	10.9526	7.8917	18.7105	36.7925	14.2186	25.1385	8.093	10.2809	26.3521	5.15742	23.7633	9.11857	4.08542	9.59361	1.08424	6.68891	21.4904	11.3733	4.45233	15.0394	23.4956	3.82317	3.83134	10.7978	7.98871	2.8563	7.93532	23.5213	8.42263	2.66731	20.4952	5.2416	26.8485	5.50353	17.7509	1.98008
SLC2A6	4.50718	10.6067	15.648	4.64623	3.78345	3.18226	4.06154	5.73251	2.92885	1.8999	7.89856	1.5788	3.36273	13.6437	2.79789	3.42693	4.07171	9.83783	2.0025	3.77319	1.89652	3.94068	2.27683	3.43955	1.55522	7.6558	3.37536	8.47347	4.60246	9.99064	4.90332	7.5919	1.02207	3.20749	2.13469	2.80442	3.25263	1.71466	4.88199	1.89915	4.38814	2.73319	5.17851	1.61715	3.95728	8.08416	1.53143	4.46424	6.49322
SLC2A8	4.88054	4.22028	4.13871	4.6232	2.01336	2.5875	3.51112	5.40605	2.57882	1.56302	4.35102	2.08044	3.34485	3.02584	6.47212	2.98297	4.59021	7.07017	2.39155	5.9255	3.67453	4.65927	3.6619	3.09563	3.06379	8.9579	3.70801	4.93476	4.78287	3.51216	4.89034	7.24787	1.51452	4.22611	3.07572	4.87011	5.59974	4.20606	3.36842	3.44103	2.77717	3.95278	6.69287	2.2089	3.6464	4.01917	4.2352	3.09367	7.00971
SLC2A12	0.271562	0.738785	0.0898398	2.9774	0.375893	0.991714	1.08037	0.330579	2.66221	1.16094	1.8355	0.983805	0.212157	0.152945	2.22281	4.15883	0.171224	0.216053	1.9745	1.57172	0.993978	1.19657	0.374663	1.18836	0.659443	0.0958335	0.849186	0.682664	0.505109	0.492239	0.284893	0.372119	0.996664	0.767838	0.365833	1.1537	0.569351	1.13361	0.612781	1.42986	0.459006	1.89482	0.344188	0.400398	0.954675	0.388555	2.10553	2.5572	1.69656
SLC2A14	0.0253913	0.182851	0.0977153	0.150614	0.02288	0.00449036	0.0247385	0.011519	0.173995	0.0262831	0.0231659	0.211339	0.0632669	0.0175107	0.0629312	0.137992	0.112275	0.0133194	0.00932671	0.0714223	0.121358	0.0758255	0.203886	0.0293949	0.0347372	0.0180716	0.0142208	0.00323734	0.0497138	0.111575	0.152216	0.00817065	0.109206	0.131015	0.0169966	0.222593	0.00686162	0.0216313	0.0422216	0.0568233	0.117403	0.111401	0.0437848	0.0256714	0.104699	0.0145969	0.00476679	0.133811	0.00399908
EIF2AK4	3.31148	4.10442	3.44339	5.11397	2.64386	4.48669	4.18122	3.91889	4.46061	5.11996	4.89473	2.96118	3.41813	2.67182	3.44655	4.15071	3.21799	1.8817	5.7938	3.71457	3.40664	4.23208	3.55015	4.00748	6.23212	4.96078	5.33756	2.58263	3.85603	3.75861	2.80981	4.28961	5.44527	3.48932	1.84647	2.36789	3.62636	3.12992	2.98606	1.99147	5.21122	4.11702	3.01527	4.0681	4.04425	4.28771	4.96292	5.39839	3.11013
ALOX5	49.5853	26.3926	55.783	21.112	30.2476	16.2216	20.9464	9.91687	25.0937	9.87984	36.1538	13.7406	9.43839	49.3346	14.0076	58.3312	27.3997	32.0912	14.5395	35.9846	20.2874	22.0397	10.771	13.3957	18.6502	1.26274	15.9655	10.4031	26.6592	29.1242	16.0858	3.41941	7.15383	27.4504	8.96754	6.60785	21.3881	25.563	15.8363	51.5715	17.6177	40.925	24.338	8.57078	24.7852	20.1154	17.8009	7.02104	52.4317
ALOX12	0.548847	0.528846	1.81938	0.427967	0.349447	0.19139	0.303143	0.188204	0.389041	0.543319	0.518376	0.236742	0.699426	0.643725	0.453923	0.429805	0.338967	0.293314	0.510158	0.857906	0.251997	0.532306	0.331803	0.870749	0.364857	0.741369	0.580147	0.820999	0.749188	0.755798	0.434976	1.07958	0.69154	0.820702	0.534271	0.335709	0.811571	0.437938	0.194166	0.706399	0.35028	1.12457	0.475883	0.280382	0.29178	0.580678	0.670466	2.53649	0.460215
ALOX15	0.0356445	0.0213907	0.353764	0.0145101	0.0249816	0.0588338	0.0911613	0.125771	0.163505	0.146356	0.0252937	0.0576877	0	0	0.0713543	0.0405642	0.0255391	0.0654427	0.183301	0.042536	0.0764455	0.0219151	0.0728552	0.0385138	0.040637	0.00739932	0.0765261	0.0689267	0.0407101	0.0848413	0.0169974	0.0802903	0.0306608	0.0520178	0.00695917	0.0168258	0	0.0118091	0.0291157	0.0155107	0.0769122	0.0864239	0.0860517	0	0	0.0717197	0.0897799	0.0230688	0.0261984
ACSF2	6.03844	5.0368	4.91628	5.42178	6.63782	4.14999	7.39308	3.3086	7.98257	3.95578	9.40533	2.67346	6.14145	4.05006	3.29608	11.5319	7.35732	6.36197	3.07356	6.68763	5.90437	5.21176	3.84313	3.68065	3.56022	1.16443	1.84434	1.65009	5.38886	6.42663	7.4657	3.71279	6.85954	7.20477	6.37892	3.94545	5.25268	6.92735	2.78463	4.43857	5.01308	6.70439	5.18349	2.91322	4.46133	3.93998	4.92806	7.06086	8.31105
IREB2	3.22442	3.9913	8.28896	6.18129	3.05532	6.23412	4.40323	2.45242	6.34699	4.66053	3.8066	5.02252	3.00088	2.70119	3.23174	5.11672	2.76751	2.03632	8.3116	4.42846	4.76966	4.29396	3.37941	3.85199	3.71871	4.18856	6.28446	4.31246	3.88204	4.00477	3.78731	5.69708	6.70297	4.11087	3.11075	2.07241	3.50463	3.24382	8.51481	3.19708	4.62757	5.22406	2.73556	4.87391	3.47781	4.65404	5.85675	3.51537	2.4944
HMGB1	22.8539	27.2066	38.4839	27.3109	24.114	22.7194	25.0592	28.9925	30.3257	25.8791	33.4176	15.4359	24.8076	19.1598	23.7694	30.7291	19.7869	25.4954	30.3262	25.7319	20.9219	23.5076	25.09	22.7025	33.8755	23.3577	28.4899	23.6709	18.5766	30.2409	24.0187	19.9416	24.447	28.5475	22.0327	16.6122	25.1994	31.0711	21.3045	23.2441	34.0525	22.3517	25.8355	22.2933	23.4354	25.7	28.4863	21.2025	25.1614
ELAVL1	10.3331	11.6322	10.5789	9.03977	10.5589	10.6862	10.1783	12.8837	8.28987	9.96631	10.1911	6.65121	11.3079	9.39527	9.86203	11.9142	10.0659	10.3416	10.893	10.5217	9.74123	10.1641	11.0019	9.46181	12.0761	18.4866	11.281	14.9486	8.91876	11.7069	10.0432	12.3439	8.30955	10.7738	8.77061	10.9338	10.5911	11.4453	8.69999	10.2213	12.6586	9.20043	11.5328	11.2891	10.0441	10.3734	9.04139	10.1674	11.2942
TFAP2C	0.363396	1.05808	0.0477067	0.980726	1.52105	0.241591	1.02118	2.46474	3.33917	1.23366	3.35947	0.427271	2.96373	0.0893382	0.987906	1.82488	2.24498	0.0494214	0.340298	1.40938	2.35541	0.587523	0.921572	0.687135	5.42726	0.427472	0.350517	0.0120121	0.296457	0.495318	1.35422	0.0606341	5.08244	0.301989	0.843503	0.343077	0.203679	0.0601968	0.0577178	0.286979	0.7696	1.03338	0.0568619	3.09573	0.791911	0.171512	2.77687	12.0337	2.73028
SP1	10.9005	13.8487	18.7787	17.8166	13.9029	15.8354	15.2028	9.39352	32.0225	15.7967	26.313	9.94001	9.88365	14.8372	14.5273	16.4898	15.3112	13.7953	18.6616	15.7815	16.6484	12.6593	7.06955	17.8068	30.7067	9.4355	16.6028	6.53111	13.3799	11.1695	15.8672	7.60505	13.022	12.6591	12.8571	8.87148	16.8835	16.3642	18.1792	18.9058	22.8026	22.0639	10.307	15.9244	14.687	11.5108	24.0334	23.0561	14.0312
HBA1	4.94054	0.0290674	4.80724	0.0197175	0.127302	0.0299806	0.0412925	0.0512724	0.0190444	0.0350965	0.0257784	0.0723607	0.0264007	0.0292283	0.0323207	0.070871	0.187405	0.355716	0.249084	0.043351	0.37397	0.98274	0.0742513	0.0392518	0.0165663	0.0603289	0	0.0648438	0	1.94218	0.138585	0.0545525	0	0.212058	0	0.503013	0.160344	0.0962828	0	0	0.209029	0	0.0877006	0	0.0537723	0.519779	0.0318262	0.117554	0.0801012
NNMT	176.078	165.691	16.7767	86.0884	177.547	146.558	97.0829	146.573	79.1235	111.676	68.2397	25.517	117.314	125.682	51.9878	47.1891	90.8426	105.808	83.2168	77.8526	87.0551	152.427	112.665	92.5096	56.3217	118.041	67.249	3.07295	122.734	131.382	25.2857	13.9588	120.882	73.1871	32.9001	64.6787	91.2698	54.644	37.8325	39.1963	78.2109	58.376	210.767	68.8992	133.285	117.899	31.2179	61.7866	28.7565
PLIN4	65.6707	1.03347	0.741549	0.368697	0.834818	0.469803	0.364313	17.2033	0.331031	0.889659	5.0579	0.93619	0.0417182	0.558084	35.2616	0.314194	0.06855	0.242015	36.0665	1.7297	1.00132	61.3285	0.550805	1.11129	0.0239964	0.0476656	10.0666	0.0540791	0.768017	42.185	0.261572	0.621384	1.00403	2.28282	1.02362	0.909268	0.407209	2.50089	2.17648	0.624487	0.94275	4.97966	2.9757	0.530402	1.03381	0.705849	6.07898	0.993807	1.55758
HIC1	6.68673	4.29866	1.07148	3.10479	2.8449	2.68616	4.40984	6.38649	3.10078	1.03553	3.1937	1.21468	3.7901	2.88364	3.24532	2.38909	2.20233	2.32927	2.8495	4.91987	3.91764	5.66147	1.72307	6.17265	0.745553	1.14008	4.4267	1.98334	5.45704	5.5785	1.72931	2.54499	1.58974	5.99473	2.16789	2.52185	4.47266	1.15022	1.8962	1.54766	2.88459	2.74948	2.45967	2.42929	3.66597	7.44727	0.97345	1.83773	1.94406
STMN1	17.5221	21.9918	14.4939	14.5313	29.4256	12.195	18.2171	24.3568	20.9437	17.8333	20.0123	7.95917	17.8265	15.3544	10.3106	22.6212	17.2537	20.6286	16.8172	15.7026	13.3137	12.32	13.847	14.5397	17.7942	21.0276	14.2202	46.8227	16.5495	16.8434	12.1306	13.4559	18.8841	13.8967	17.2418	9.08079	13.7532	7.33851	8.30466	11.584	16.9633	8.94323	22.1254	17.5012	18.6384	15.2505	11.2713	37.1153	11.9789
RRM2	2.9507	2.04261	6.40557	1.55836	4.25617	3.67802	3.88979	10.7398	3.2125	9.01051	4.75677	3.58198	5.62793	4.67917	2.60891	6.54474	5.54069	10.6051	2.62693	5.14298	2.13918	1.06391	9.40528	3.59503	7.07973	2.13495	1.87202	0.116557	5.43761	4.36686	5.32468	0.257404	5.00608	3.34572	5.46927	2.81654	5.36553	4.87163	2.36023	5.58352	5.27493	1.57665	4.69973	8.22099	5.2285	2.22811	13.2177	17.0246	4.31499
CAPG	240.76	139.958	31.3992	105.031	88.3075	44.8822	92.143	119.881	117.432	107.651	117.912	55.7917	75.1477	139.281	72.837	294.343	159.291	255.675	42.3896	118.064	60.5484	69.3529	180.767	88.8151	100.724	6.1833	37.4097	2.27074	74.3194	82.4534	193.478	4.08862	67.4177	124.617	224.869	69.6438	100.183	235.53	58.9118	128.846	90.0816	53.5512	71.4229	107.593	98.2217	40.9335	49.9336	128.475	169.73
HNF4A	3.84476	5.67691	0.0313738	5.18403	4.64095	10.875	7.76738	0.207884	7.09513	2.1405	4.40156	5.06403	5.3943	9.15001	8.50497	15.3764	9.26785	8.99884	4.34074	10.9372	5.69963	6.00995	8.44077	6.64382	14.8772	9.82204	6.47081	24.279	5.12045	1.8171	17.1654	12.8723	3.54036	8.47984	21.9037	10.0537	14.661	17.8172	16.1675	18.3818	7.65147	10.2118	6.55074	2.22674	8.90505	3.50623	12.0806	0.0349077	17.9463
NGB	0.0107337	0	0	0.00873892	0	0.0265751	0.0366022	0.0227242	0.0506435	0.03111	0.0114251	0.601326	0.479739	0.0259083	0.873808	0.0314105	0.0922878	0.013138	0.441583	0.0576403	0.0276242	0.0131987	0.263269	0.0782849	0	0.106952	0.108209	0.0287392	0.0210156	0	0.829192	0.060445	0	0.0939854	0	0.0304007	0.0101522	0.0426731	0.0131515	0.0280246	0.0463215	0.36435	0.0388694	0	0.190658	0.331156	0.0211583	0	0.0710027
YWHAE	88.5798	111.016	49.4358	101.579	99.3117	88.4869	82.6713	90.7218	82.7138	100.547	81.4669	54.072	76.2363	65.6039	55.1121	61.8847	69.765	73.5544	104.952	93.4263	81.1574	101.21	90.7085	73.7379	86.0677	140.524	101.709	208.861	69.6616	63.3372	94.1609	124.494	142.903	84.2479	77.6436	122.525	64.7337	73.8184	66.1655	71.1389	82.1202	80.9581	110.102	78.9019	94.55	82.9081	106.852	101.909	86.954
GABPB1	2.07121	2.44865	6.00282	2.78146	2.09584	2.27793	3.01686	2.75108	3.19099	2.50795	2.4451	1.46596	2.33493	1.80034	2.43732	3.02969	2.28051	2.20796	3.30354	2.7289	2.66301	3.74076	2.18369	2.28778	2.89491	2.13939	3.5071	8.87172	2.02256	5.08873	2.32239	3.98176	3.34814	2.58974	2.1091	1.65908	2.4516	2.14943	1.75276	2.10275	2.93231	2.55066	2.36897	1.38071	2.38935	3.67586	2.78531	2.6787	2.32341
AURKA	1.59541	1.28485	3.19227	1.20894	6.17887	2.49654	3.30897	11.6974	2.06379	5.15451	5.2195	2.26992	4.09571	3.25908	1.97247	3.96132	4.08547	4.70015	2.53944	3.28849	1.82486	1.05308	7.15002	2.10442	8.30537	5.23875	2.46786	0.320528	2.10273	2.45826	4.93357	0.676737	3.517	3.37144	2.58896	2.55598	3.98474	3.61069	1.56975	2.98133	4.5304	1.909	5.32718	5.97548	2.54555	1.77875	6.01292	19.303	2.74117
MIR4715	0	0.614462	0.725866	0	0	0	0	0	0	0	0	0	0.279045	0	0	0	0	0	0	0	0	0.314763	0	0	0.175099	0	0	0	0.250592	0.281207	0	0	0	0.280172	0	0	0.242111	0	0	0	0	0	0	0	0	0	0	0	0.564426
RIPK1	8.91388	14.0143	14.2715	10.9579	8.67258	15.2948	11.6615	11.1711	10.1516	7.16883	10.5106	8.25061	9.32635	13.2497	11.4177	9.7813	6.72304	5.96713	15.0996	13.7229	11.2182	14.5342	8.03511	11.8133	9.26875	8.50689	13.1301	12.9635	9.99428	10.601	12.2073	9.39342	7.56478	11.7652	12.6032	9.20964	12.269	8.86429	9.63339	12.8741	12.4583	12.1757	8.67129	9.82225	10.1346	11.5402	14.462	7.0063	8.46793
PRDX1	150.458	140.716	83.8676	180.456	184.658	173.921	131.098	217.367	138.699	209.992	141.27	67.7257	155.08	130.286	114.849	165.816	163.52	185.314	102.023	115.182	117.424	93.4856	95.6204	116.307	213.564	30.7146	85.0109	67.3072	118.611	152.224	167.571	31.3054	170.806	172.895	235.863	82.0363	136.325	116.474	141.567	158.279	144.838	89.0851	196.274	98.2644	106.822	125.934	173.06	123.671	232.236
MIR30B	0	0	0	0	0	0	0	0	0	0	0	0	0	0	0	0	0	0	0	0.411342	0	0	0	0	0.157191	0	0.128703	0	0.224963	0	0	0	0	0	0.269194	0	0	0	0	0	0	0	0	0	0	0	0	0.446172	0
CS	15.4684	23.6419	20.2296	21.1858	21.6678	17.9874	14.8376	17.9756	16.8559	13.0644	18.6402	12.7553	12.6097	15.5766	23.451	16.9774	14.7662	14.4367	20.1938	17.381	16.9876	18.9041	14.0328	15.932	19.7143	25.0378	17.6469	19.0405	12.8422	14.8623	19.2322	21.5376	22.9079	17.7152	16.2811	14.6989	14.9053	20.3062	18.1419	17.484	23.0647	19.591	24.3986	23.0734	22.1974	16.4485	20.0951	19.883	14.6403
EMC2	8.24724	8.90353	6.25606	10.0805	9.23245	9.72616	9.16468	8.80933	13.7193	10.3318	15.0635	5.98859	8.2791	8.75916	8.80083	9.70376	8.4107	7.45634	11.4829	8.9514	8.91031	8.68118	8.36284	10.2764	10.8329	7.37433	11.7422	9.62793	7.97943	6.38082	9.3601	4.12022	10.8482	10.7536	8.25764	5.15034	7.48175	10.807	7.22157	9.12322	10.1672	7.5386	10.5684	9.49137	7.80196	10.2521	8.84188	18.0064	7.75396
NOX1	0.391812	0.249527	0.249418	0.188794	0.336249	0.346454	0.449907	0.541715	1.31417	0.173817	0.27236	0.364343	0.313802	0.144754	0.181413	5.43648	3.13503	0.557872	0.308401	3.49242	0.610508	0.432629	0.212468	0.155517	0.470393	0.298782	0.38962	0.171276	0.164386	0.395291	0.198278	0.306198	0.330152	0.560122	0.243541	0.830399	0.219326	25.5907	0.249832	0.354911	0.603883	2.77888	0.61773	0.18392	0.17754	0.396861	1.42909	0.116439	0.775779
CYBB	24.4286	24.2328	92.5819	38.1471	12.2134	31.4691	4.91892	9.2778	19.6052	19.9368	4.414	25.8938	4.15672	15.2183	21.0997	16.4389	12.5243	11.2595	33.7395	18.8806	20.6623	13.7515	7.10692	11.3857	10.9618	3.65594	13.2054	2.03619	10.1781	33.7274	4.10757	2.84246	3.53561	15.9434	4.48822	3.00856	4.3806	2.14941	5.92127	11.9929	9.75692	11.6176	2.82567	13.5215	9.21752	12.8608	7.12588	1.98846	2.76732
NOX3	0	0	0.028082	0	0	0	0	0	0	0	0	0	0	0	0	0	0	0	0	0	0	0	0	0.00802529	0	0	0	0	0	0.0108792	0.0850037	0	0	0	0.0348027	0	0	0	0	0	0	0.0160076	0	0	0	0.013284	0	0.00961389	0
NOX4	5.24135	1.3776	0.051737	1.92298	0.631225	4.56653	1.73075	2.14905	4.36159	9.03061	1.30647	1.05063	4.02849	2.57828	1.22189	1.27816	3.49395	1.62008	2.38544	1.68046	2.86288	1.50927	1.25437	7.25024	2.51877	1.4172	1.4083	0.0414493	3.84828	2.32868	0.351179	0.12703	1.91755	3.07532	1.14637	1.03663	3.35095	0.563802	2.75779	1.09419	6.31331	0.96518	2.18633	3.2076	1.56884	1.71762	0.183094	1.768	0.347443
NOX5	0.0113145	0.0252199	2.98841	0.047375	0.193715	0.0700329	0.228741	0.0325088	0.100413	0.0819836	0.0344096	0.0398429	0.0317163	0.0117044	0.00431425	0.0536069	0.0347435	0.0474818	0.293695	0.0983723	0.181647	0.168942	0.130498	0.0523943	0.0121622	0.00805285	0.108633	0.357761	0.0427233	0.122521	0.0246649	0.356809	0.328127	0.0495356	0.0189346	0.0274678	0.0168167	0.0738994	0.0257459	0.0281343	0.0418526	0.0391904	0.105358	0.295994	0.118431	0.0238499	0.0775303	0.101994	0.0338584
DUOX1	0.725186	0.784727	0.799701	0.614781	0.796258	0.607035	5.11065	5.56113	1.40845	1.75487	1.71778	0.832305	4.65536	2.14216	0.525377	3.19556	2.45841	1.0426	0.980654	1.86265	0.515464	1.37863	0.915222	2.27419	0.592116	0.217923	1.02376	0.357512	1.80749	1.05715	4.26391	0.912687	2.31496	1.11373	2.18444	2.98415	4.22862	0.93585	0.786988	0.985761	2.02676	1.17963	7.54476	0.558037	0.812737	0.484834	1.22074	0.225727	0.817275
DUOX2	14.6105	45.2723	0.0174934	20.7016	26.6229	6.32845	13.3934	5.0283	23.6736	1.37677	1.55188	4.58965	24.006	73.9141	16.466	70.5406	58.0893	4.74197	8.60967	31.8141	2.82254	11.093	9.68813	2.04304	17.0611	0.0512249	30.5202	0.00183529	51.0842	7.21988	2.54563	0.266342	11.4002	25.0775	43.6684	18.3927	55.9041	25.413	1.01791	62.0884	6.18094	63.5899	77.9164	0.0509369	15.0305	2.3667	124.821	0.133752	2.58225
G6PD	20.6967	11.2947	16.7207	10.3472	25.7417	11.2716	12.3824	16.3043	9.05932	11.1723	13.0171	6.675	17.4978	13.2063	9.9758	17.3485	12.8117	12.3259	10.1544	12.4727	10.9542	13.355	13.2057	11.9472	13.7097	6.87914	9.06008	11.3428	12.6338	16.9805	17.2012	8.28988	14.8905	13.8626	15.4563	14.3509	10.355	13.9647	8.2636	12.6076	9.51755	12.9639	40.034	14.5183	13.6067	14.6637	13.1226	27.9679	14.6669
PGD	60.1011	52.6423	24.2637	42.8534	37.1071	38.6817	42.3376	38.2584	29.8633	56.2745	24.3045	24.9192	43.0263	43.8	31.8467	38.6801	41.24	35.3336	39.1814	30.816	26.9813	33.7531	19.9071	31.4824	46.9318	20.2874	28.8187	44.658	35.9358	38.6709	36.0368	17.1547	25.6114	36.1853	47.7375	28.5216	34.9905	17.2732	20.2873	31.0571	38.7064	33.8115	37.438	33.2945	29.7163	32.4122	70.1555	34.7292	49.0772
PIK3CA	3.02765	2.76472	4.78928	4.24243	2.39227	4.84928	2.94563	1.84925	4.92725	5.89008	2.78354	3.01111	2.14332	4.3749	3.76527	2.6976	1.90479	1.18092	7.6559	3.15017	4.90523	3.26319	1.85343	3.35902	4.41545	2.13039	5.22306	2.71749	2.51167	3.2033	3.34248	1.71828	3.99985	2.46712	2.24783	1.12387	2.58316	1.65089	4.07692	2.23663	4.17756	4.42501	1.61592	4.49003	2.46661	2.99766	3.76555	6.89848	1.37877
FLT3	0.37926	1.91416	3.24013	4.10515	1.06322	2.17894	0.663222	0.422051	1.55618	0.0352316	0.238073	2.08474	0.0212018	0.164308	0.519121	0.393662	0.275918	0.136882	2.40875	1.34035	3.3745	1.35123	1.05346	0.594982	0.056542	0.0181683	1.5713	0.0390559	1.32327	2.55859	0.143755	0.355956	0.133839	2.0702	0.074046	0.477405	0.335719	0.0579919	0.92342	0.829404	0.325242	2.44429	0.140861	0.0516175	1.12277	0.945724	0.214056	0.0896849	0.33772
SCP2	13.794	15.8048	8.64467	16.4423	13.1806	23.1649	13.4471	7.46447	20.5434	15.0039	14.8821	10.7219	11.9526	14.0879	12.9756	19.7495	17.1756	10.7502	19.9554	17.9966	13.5484	12.5604	10.2698	14.6019	26.3748	14.0206	18.0164	22.6466	12.9722	11.9169	15.104	9.83976	14.8836	17.9014	15.9477	8.18377	18.7283	19.1431	17.3815	14.3529	20.2281	19.5888	8.57069	8.18126	11.6345	15.1683	28.7124	13.5518	26.2599
ACSL4	20.2003	17.635	10.6999	21.2507	14.0116	14.4037	9.59399	4.82182	17.548	21.8867	7.73421	10.1958	9.26456	12.0868	11.4893	15.1011	7.05238	4.21342	18.448	11.0597	14.6032	14.2647	8.98828	8.0878	11.9525	14.5274	13.5681	7.19114	13.7759	8.34592	18.162	6.60371	19.4883	10.789	14.8818	9.63063	10.5279	8.42812	5.80522	8.0823	8.23723	15.0367	9.77922	9.44825	10.8768	15.265	13.4801	9.25422	4.82389
LPCAT3	2.13137	2.3886	2.03888	3.06982	2.50163	5.82267	1.87538	1.48145	3.70543	2.09326	4.74232	3.24165	4.53955	3.17143	3.35277	4.24156	3.75339	0.780536	3.91027	2.99544	2.90419	3.38919	4.62319	2.96885	5.21403	3.91269	3.92869	5.8289	1.86864	1.36818	4.53485	2.85841	3.14765	2.68413	4.65759	1.58794	3.06028	4.92586	6.50506	3.75082	3.47232	3.36905	0.836915	3.0706	2.94581	2.52602	4.13668	3.6604	4.05318
NRAS	11.2316	16.4427	14.8095	16.8749	13.5613	15.2487	10.2686	12.0287	14.9799	18.6643	13.692	11.4147	10.45	17.2523	9.46908	17.5532	11.3842	8.27289	17.4295	11.4151	12.6533	11.3796	11.4644	10.5273	17.7193	4.54605	9.37585	8.34054	9.98958	12.1338	12.6842	4.35651	20.3664	11.9349	17.9598	5.62578	13.4347	8.36669	18.9938	8.76214	13.8486	12.6812	6.00786	14.0778	11.4445	12.7246	16.6264	13.9526	10.1427
KRAS	6.22289	6.78412	5.81131	7.63005	6.27999	9.7845	7.34254	3.79929	9.75857	7.40065	6.91263	5.41987	9.09316	9.72614	6.57878	9.16052	6.01712	5.69477	9.47309	7.75319	6.04639	5.65298	6.51527	8.23197	10.9022	5.88117	8.09655	4.96313	5.42499	5.63447	10.8846	4.6038	10.3674	7.17173	11.8575	3.68132	8.24321	11.8029	12.5312	7.35117	9.16679	8.09799	5.06452	5.54431	7.89529	8.41047	9.51155	15.7171	5.70042
HRAS	18.3353	18.1838	11.4285	11.0382	23.633	10.9506	28.3422	63.5605	11.0731	10.6774	19.3423	6.67273	18.858	22.668	12.1547	16.7467	30.0006	38.9302	9.66635	14.5066	9.91851	16.6178	22.3944	13.2321	18.0707	13.3816	14.5575	48.956	18.5901	16.4399	12.9304	25.9451	14.0266	19.8892	17.1088	27.031	19.7458	21.6493	8.74694	17.6659	20.2876	15.3564	38.6953	15.6222	14.676	16.3722	7.19556	36.3406	19.1081
TFR2	0.119777	0.282726	0.74722	0.221039	1.26759	0.153218	0.585432	0.253578	0.266866	0.616199	2.29911	0.295247	0.161036	0.0578217	0.181162	0.0934686	0.501186	0.420269	0.236114	0.628911	0.277431	0.225834	0.428429	0.291192	0.0600834	0.382906	0.796053	0.128279	0.26578	0.460536	0.955752	0.296781	0.2301	1.02693	0.598657	0.493781	0.0944065	0.190475	0.860973	0.138989	0.361829	0.709895	6.5254	0.328479	0.345724	0.321334	0.175766	0.0736426	2.39455
SLC38A1	3.73553	9.06386	35.3938	11.6276	16.6955	13.8179	9.94269	11.4394	11.6991	11.9329	12.0574	7.61826	4.90418	5.34657	19.7309	8.03015	6.61974	4.52281	12.862	6.49867	12.335	7.98254	7.06152	9.11588	15.3577	19.0533	11.1608	8.33298	4.90224	17.7856	13.3262	1.28945	11.9445	7.72409	11.8717	11.5522	8.53304	15.6096	7.21428	12.2449	19.5714	13.9366	23.8275	29.5096	13.136	11.2702	12.1716	16.209	9.97981
SLC1A5	27.566	13.7236	13.1312	12.8916	27.6078	25.4245	28.3533	95.6213	25.3421	35.1412	51.1896	15.0645	42.0051	20.8092	16.1991	65.3934	56.2	68.6471	16.2294	26.8444	16.4421	25.7096	28.9097	34.3983	67.4122	19.4121	23.8006	1.29999	29.5881	21.8287	23.6276	3.61595	34.7428	41.8691	63.3177	31.7716	27.9841	56.2134	16.237	27.2284	40.3216	34.5023	51.9482	32.1876	24.5521	27.0527	39.5791	33.0649	40.2338
GLS2	0.0586013	0.105502	0.193868	0.123252	0.0667404	0.211587	0.124895	0.0361853	0.142086	0.0141539	0.114356	0.299115	0.010647	0.0412555	0.0651722	0.0952706	0.050385	0.0119545	0.217646	0.288466	0.167573	0.34228	0.553971	0.114765	0.0701496	0.541335	0.382908	0.784514	0.0669293	0.139483	0.190954	1.17701	0.113418	0.149659	0.143015	0.175195	0.110853	0.165025	0.128644	0.221002	0.0210746	0.165766	0.10021	0.0388814	0.227698	0.117911	0.0834274	0.128001	0.145366
GOT1	9.79414	15.4799	8.38624	17.252	20.7419	13.1159	15.5185	22.5101	13.4026	10.0224	18.2038	9.72123	12.441	10.5113	19.2611	26.4475	23.2903	20.6674	14.186	13.2906	13.7553	15.5414	12.2942	13.7645	28.282	26.5693	14.6152	46.4607	12.7486	11.7401	20.1934	12.8912	9.04908	21.7683	14.7275	28.5587	14.8106	18.8387	8.73957	15.1962	18.7392	24.7853	52.9387	12.0151	14.6888	15.6444	35.1481	28.1353	15.5714
CARS1	5.454	6.16152	4.95906	4.66514	4.47343	5.18783	7.45785	10.2136	5.71631	5.36214	11.5313	3.92193	7.27864	7.22174	4.7915	7.70007	7.38303	6.30573	4.37404	6.09132	4.52151	6.211	6.01652	6.19128	7.67924	5.89719	3.6064	5.02767	5.15184	5.49796	5.22079	3.38107	5.84914	6.54723	6.53059	4.78575	5.76833	9.60196	5.29023	5.53917	6.56023	5.10649	5.5328	12.3965	4.60764	6.02679	5.70577	6.91026	6.2462
KEAP1	17.7167	19.941	14.1948	16.915	21.9773	17.0797	16.9692	36.489	15.568	6.53357	32.3246	9.95239	12.1447	17.2027	17.6379	19.7415	22.6757	25.0349	16.4243	20.6833	16.6792	17.2696	23.6778	19.8037	24.1863	28.2813	21.4984	34.1385	17.386	14.8496	20.0864	26.6695	14.3007	23.1222	15.482	18.7871	18.9945	28.0991	22.2872	22.4474	17.7974	23.2749	25.7795	21.8283	20.4145	20.779	20.8338	16.9538	27.9323
ATG5	6.54808	9.01346	8.32662	9.40034	6.35146	9.18897	7.29184	10.4621	7.48237	8.31425	7.42183	6.58015	5.55994	5.98255	8.08337	10.574	6.57127	4.71495	10.0012	7.85681	8.22419	9.25331	5.97569	8.63947	8.04495	14.1388	10.8588	8.08128	6.05971	7.2103	10.597	4.92619	7.10229	9.30584	9.3186	8.91071	9.76902	7.43863	10.3892	8.62831	9.38265	8.3269	7.81762	9.69388	9.7001	7.57579	12.3698	9.80336	6.67774
ATG7	3.72486	3.87439	2.99279	4.58901	2.31776	3.63901	2.31475	5.77747	4.00567	3.41396	4.3084	2.17696	2.04897	3.24929	3.66946	4.90632	3.44867	3.79419	3.94206	3.49564	3.38005	3.65408	2.61813	2.89052	3.39361	1.63676	2.6683	2.05348	2.95393	2.91745	3.09831	1.99316	3.84015	3.05204	3.58567	1.87609	2.56597	2.34599	1.85698	3.13813	2.49963	2.92718	1.73824	3.17775	2.92792	2.4875	3.21317	3.73828	2.75625
NCOA4	32.7751	43.1754	60.127	60.3187	29.5046	65.7727	38.5704	26.0663	53.7411	41.293	40.443	38.939	25.8817	32.7701	48.4378	39.4612	34.6504	21.4266	69.3838	42.1616	43.3509	47.5197	26.5185	39.4042	57.1728	25.0329	53.0919	48.4898	31.5709	37.5684	41.6792	22.5244	26.312	38.4394	31.4479	22.3399	32.4531	28.8058	53.6308	32.4159	42.0195	47.5767	24.1766	37.6391	41.9829	43.1529	62.9939	27.0578	40.5177
ALOX12B	0.0152277	0.0731062	0.323852	0.0309942	0.0640343	0.0471268	0.337523	0.0483574	0.245476	0.0275844	0.00810427	0.0568724	0.0829991	0.0367554	0.0203221	0.207952	0.117834	0.158427	0.202295	0.44975	0.156759	0.205971	0.0466866	0.135741	0.499982	4.13466	0.127928	1.67843	0.0372679	0.167285	0.232366	0.583113	0.314366	0.0833342	0.160543	0.0287524	0.0720134	0.317831	0.00932886	1.04695	0.115002	0.233833	0.487097	0.323309	0.0507152	0.122557	0.135075	0.170002	0.495254
ALOX15B	1.95678	1.17028	2.83119	7.41104	1.56567	2.00072	1.22978	1.16646	2.0324	3.66804	0.31278	2.0902	1.95111	5.99662	7.91452	0.403896	4.12856	0.572204	1.44816	5.66641	0.704692	2.38152	1.35821	3.94537	1.28369	0.848449	3.55336	0.0834461	1.75215	3.41888	4.85981	0.0752169	3.03319	2.17096	0.594573	0.189151	4.59851	0.458003	1.91477	3.10373	32.6541	4.17769	2.99079	14.9594	2.87668	0.367294	0.0394937	2.89805	0.434411
ALOXE3	0.0699176	0.051641	0.0228764	0.0394088	0.282704	0.199738	0.0917001	0.153715	0.135337	0.0155881	0.0228989	0.0883821	0.0644921	0.571195	0.0430656	0.173125	0.14335	0.190906	0.165946	0.0962715	0.0599799	0.138881	0.329786	0.19177	0.283279	0.502406	0.0903659	0.244803	0.0526509	0.0649918	0.112846	0.617851	0.12491	0.158938	0.195308	0.045698	0.0305214	0.812514	0.13509	0.33233	0.0928401	0.139095	0.240205	0.45676	0.131356	0.620435	0.0706778	0.76751	0.438781
PHKG2	3.55486	4.58985	5.93748	3.06962	5.75014	2.31368	3.9397	6.55955	3.45402	1.61573	5.15406	1.53085	4.40657	6.54911	3.57609	5.58227	4.07989	6.94859	2.18354	4.56514	2.54595	3.99702	3.19811	3.45692	3.26248	3.45155	2.82958	6.52561	4.02578	4.98211	3.59067	5.7053	2.74973	4.80754	4.56177	3.40441	5.65728	6.88437	2.1976	5.58991	5.57857	4.24427	6.69658	2.41818	3.24087	4.06041	3.10022	4.58828	5.76299
ACO1	12.9846	9.0692	3.60911	9.15933	8.07603	9.16856	6.53987	7.5283	8.51617	10.9018	6.91191	7.25374	5.26093	5.94714	6.80857	5.36029	5.44049	6.16258	8.74521	7.06714	8.12407	10.1111	6.63356	5.73513	7.08578	9.96823	10.1131	1.93263	6.55611	6.68079	9.12115	3.76831	5.26567	5.44037	5.0545	6.49191	8.8178	6.04966	8.35152	11.0908	5.66011	7.01774	11.0176	6.90964	10.9293	6.23305	11.3018	4.74483	9.94784
ULK1	7.78538	12.6429	11.5056	7.69755	7.88843	4.34998	7.64544	8.74762	7.66258	2.06272	6.41957	7.46331	8.55647	9.93482	11.7238	8.54057	7.1806	5.24123	4.84561	13.8598	8.55544	8.23648	7.16051	8.65262	7.74369	24.9986	9.17323	15.2726	9.66418	8.37457	8.57342	25.8621	6.54595	7.91025	4.13188	5.85948	13.6085	7.79868	8.22495	12.7647	5.77554	15.1192	6.83724	21.8261	9.76135	8.56066	7.42789	11.3511	8.0265
ATG3	6.70437	7.00217	8.84878	7.53023	6.53332	7.87349	7.11476	11.7557	7.84824	6.81208	8.27042	5.88541	6.1758	5.96262	5.69698	6.94324	7.36338	7.83749	8.20802	6.76456	6.10062	6.47395	6.20235	6.59957	8.48622	5.05724	8.50876	9.98542	4.90788	7.35423	8.76425	5.91102	5.61897	8.04791	7.656	5.03611	6.4288	5.91361	6.05144	6.67863	5.14821	6.07641	7.35376	6.06279	6.01016	6.59617	7.69718	6.29006	7.13975
ATG4D	6.37385	8.53436	8.68459	5.0809	4.95554	4.36278	5.07048	12.122	4.89348	2.16126	10.479	4.19739	4.0257	6.48173	7.51109	9.33467	11.0749	10.1702	4.09337	8.46953	4.85105	6.29845	6.02398	8.63264	9.87972	26.6689	8.38253	17.2242	6.7003	6.95328	7.14562	18.2565	3.50494	10.2603	5.52189	8.21325	11.6708	10.6495	5.61245	10.4376	7.10647	8.37992	7.62947	4.80621	6.7606	7.7877	7.7753	6.07561	8.80832
BECN1	7.29883	8.65425	10.9341	8.79422	6.38709	9.15251	9.27295	8.32686	9.63197	7.95236	7.60118	5.54144	6.78109	7.88406	10.7674	13.0183	8.95917	5.59175	9.60914	9.46433	7.61918	8.56403	8.06494	10.2659	6.26726	16.768	9.21749	12.0546	6.56496	6.56001	10.0281	9.48454	8.81135	10.6768	10.0533	6.00371	8.36759	11.7354	9.10322	8.61313	9.50388	9.953	7.35649	8.21133	8.50535	8.48374	11.8021	4.36767	8.69687
MAP1LC3A	22.0357	14.7529	15.3122	11.7921	14.2735	11.0819	17.4549	47.6962	11.6874	5.36383	25.7884	5.7695	20.8685	14.8207	18.2727	14.3969	22.913	30.9047	12.5122	20.7081	15.4872	28.6202	11.1309	22.6004	7.08913	28.9611	24.323	58.9793	19.9653	21.9758	22.1323	64.6561	11.1852	17.3225	26.1359	24.4117	28.0823	11.6921	9.00678	11.0571	17.5827	13.3384	23.8697	8.04126	16.589	23.8776	6.51551	15.3197	13.9564
GABARAPL2	29.3204	24.8792	23.0961	27.9304	30.6768	29.4894	28.9221	32.5115	29.3669	25.2005	19.8719	15.7177	20.4897	24.7756	25.5379	34.985	31.8227	27.7378	31.8022	26.5819	27.583	35.9635	21.2184	29.0267	27.0729	39.0013	40.249	79.7297	22.9287	27.1871	29.7877	37.947	30.9542	31.7267	27.9209	29.5499	25.7776	27.6776	20.1796	23.232	31.9136	25.1997	32.5842	22.4949	25.2765	35.4944	28.6245	32.8508	24.4406
GABARAPL1	31.9469	24.8118	7.82403	34.7778	24.4852	18.0616	15.8389	23.6537	24.1099	13.6702	9.45074	15.3604	16.0128	14.156	32.1463	15.8636	20.2976	12.6183	24.5263	16.8854	20.5578	21.7017	18.0719	24.6938	10.1258	53.4382	21.3517	4.01954	20.6398	15.1582	30.1993	30.7466	15.0236	17.9354	20.9062	21.1709	22.5907	8.84436	25.2929	17.9268	17.2788	28.1915	17.0798	18.7829	27.9443	26.7409	24.8741	27.6937	10.8964
ATG16L1	6.60143	4.71216	8.6532	4.36448	4.8411	5.19553	8.62694	8.31185	7.51843	5.89553	8.78867	3.50967	5.75631	7.79752	6.89088	10.1646	6.16755	5.41946	5.91591	9.71548	5.53117	6.88378	5.35548	6.78324	7.70905	3.30305	7.55182	5.12166	5.55566	7.0904	9.55549	3.19771	4.47314	8.99691	9.57433	4.96313	6.80049	12.6803	4.98663	7.96297	10.3765	6.85425	5.83305	7.20088	6.45245	6.95756	7.35895	15.3234	11.0092
WIPI1	11.086	7.99054	5.46128	9.07899	9.96728	8.52856	9.26338	9.37544	8.07256	8.98034	5.83363	6.52254	11.126	10.1439	6.58432	6.92895	8.13132	4.59823	6.30722	5.85213	5.71638	6.95847	6.13559	10.2411	4.6638	6.76696	5.40325	23.5019	10.2999	6.32766	11.2476	6.36005	7.74129	5.97905	7.13735	6.52101	9.67582	2.61725	5.30581	4.76975	9.8249	5.5632	16.0653	13.0361	7.5625	8.97023	9.52226	9.5561	3.95173
WIPI2	8.11416	10.0173	10.4026	7.97255	9.07022	7.84728	8.00047	13.561	7.22209	6.05569	10.2362	5.4165	7.38912	8.96892	9.97198	9.4333	10.4105	11.5887	8.33688	9.94772	9.23347	9.85013	7.85962	8.5288	9.50131	14.0372	8.57167	13.2853	7.73389	9.19351	14.4331	13.6598	6.75295	9.10787	8.43115	9.30655	11.3947	11.1656	7.54336	9.14967	10.7957	11.1058	8.98142	11.5167	9.09301	9.11049	8.7226	9.79719	8.99294
SNX4	11.0032	16.4496	9.40907	16.9625	11.952	14.7301	13.7586	8.3918	14.5167	13.5818	10.1944	10.6055	12.4504	12.0812	10.311	17.9709	9.72364	6.60599	17.1274	16.6092	13.1855	13.4658	9.64289	10.7013	12.8882	20.4455	21.7487	21.7391	11.7582	9.69309	16.517	12.7625	12.0525	12.9664	9.97755	7.14614	15.0246	8.02774	14.0991	11.5511	14.2711	16.5669	13.426	9.50291	12.6462	11.0547	22.9109	13.6095	12.6
ATG13	9.662	14.4567	10.521	13.4987	14.2266	14.8787	13.1199	18.529	10.1622	9.29274	20.455	8.03703	10.668	13.0377	10.8321	13.0087	13.3414	10.8999	14.2722	12.3418	13.2148	15.8553	10.8897	10.8775	15.5103	17.1213	13.6991	27.5866	11.9866	11.9057	15.7355	16.266	10.4876	11.8334	10.5875	11.9742	14.1846	13.2462	13.7194	12.6044	14.1419	13.9882	13.3294	16.8421	13.654	11.6625	12.0898	8.38148	15.273
ULK2	1.89629	2.60639	2.18759	3.05263	1.42982	2.06008	1.9231	1.46797	4.03085	2.41459	1.07373	1.75714	1.38184	1.22982	2.98311	1.20042	0.992737	0.696564	3.80522	2.14033	2.52562	2.56419	0.999421	2.00954	1.14395	5.51956	3.07224	4.0541	2.32299	1.60245	0.877812	3.18161	1.70892	1.85514	0.616112	1.91246	1.79356	0.496197	2.51223	1.19797	2.17221	3.05189	1.72107	1.0487	2.54081	2.2791	2.25169	1.93663	1.05325
SAT1	279.85	482.345	191.302	264.237	119.08	90.0434	107.482	446.694	181.963	95.255	84.3505	72.0314	286.297	291.91	133.048	152.018	240.927	309.676	124.975	141.039	114.339	107.25	119.598	203.396	102.174	61.7885	102.59	12.8823	217.82	153.764	137.29	46.1714	84.8993	231.18	95.5717	259.747	270.018	145.07	87.1029	242.679	214.314	184.897	179.43	117.787	194.59	116.127	208.769	351.395	222.431
EGFR	3.60572	6.45498	2.48646	7.5874	12.0542	5.49117	6.62397	5.23553	6.71614	9.71013	5.5635	4.67226	3.50883	7.65064	6.09052	6.94001	7.96978	1.83142	8.96227	6.22805	7.73239	6.11441	6.53913	5.21936	6.58503	2.21927	5.80056	2.85602	4.97018	2.4459	3.5564	1.08949	12.758	4.68423	5.76096	3.65011	5.89106	12.1593	6.2455	4.24472	6.83762	11.818	2.42386	14.5619	8.63286	5.13805	8.00157	11.8189	3.66908
MAPK3	27.3434	19.3958	15.7776	15.1	25.3444	23.6009	19.1708	20.3677	24.0199	15.1161	29.0989	14.1502	24.6943	44.0352	27.4659	64.0375	54.0803	50.2324	23.3551	49.2113	20.5443	29.2106	26.688	25.1509	49.9098	9.89231	24.331	37.2966	28.6402	27.4286	47.099	17.6234	18.931	30.1931	31.8695	19.4298	39.8644	56.1447	35.0997	46.5193	31.1712	25.6136	17.3711	23.6141	18.4054	28.5529	26.6654	19.5834	52.5925
MAPK1	8.86243	10.7461	15.9748	13.3125	7.05708	14.5331	9.08213	7.11904	11.862	17.3504	7.97311	10.4269	9.1457	9.46427	11.5298	8.88147	6.36062	3.12455	16.5417	10.1097	11.6398	12.3739	8.73262	10.0558	11.3045	9.67853	13.7917	13.2496	8.95009	9.11661	10.9073	6.6342	11.6836	9.62583	9.64404	6.2297	10.2501	5.88468	16.028	8.00948	9.15731	12.0531	6.40181	8.96698	12.2983	14.1229	13.8876	14.7721	9.62124
BID	8.16443	7.90481	7.38397	6.83969	9.37688	6.50901	9.18981	18.2767	8.89885	8.47002	8.72907	3.87655	13.0998	7.97051	4.94716	9.86732	7.53203	10.6612	5.44212	7.79163	6.2431	6.53258	5.44323	9.49495	5.8399	5.07032	5.28336	1.48575	7.21338	10.0884	9.37424	4.79488	8.99088	9.83714	6.6389	6.17064	6.50465	7.78465	3.85371	7.87739	5.50588	4.7127	17.5965	5.69769	6.6754	11.3788	6.12668	18.3775	13.2435
ZEB1	7.80839	5.80827	5.19074	16.763	3.9594	12.1696	8.80516	1.89068	14.3284	13.7567	5.88514	6.23596	6.15209	5.90248	16.0398	5.35674	2.84825	1.49084	17.7068	8.97211	10.834	8.84551	2.24107	8.38895	5.94092	3.37481	11.0522	3.01916	9.09048	6.01998	2.48605	4.12332	7.64772	6.88315	4.05589	1.55823	6.26871	1.42204	8.08919	3.57889	6.2703	7.24036	2.40431	6.1942	5.42432	11.4305	6.79425	3.6585	1.66245
DPP4	2.00245	1.40036	4.69371	2.97465	4.20604	3.1136	3.11821	0.568382	3.50804	6.60239	0.739128	4.05602	11.6538	4.5459	5.54411	6.48993	6.67503	1.66528	8.24911	5.74516	3.31445	5.12318	0.78392	4.05029	5.59499	13.456	3.02535	47.1833	6.61209	3.41059	1.77116	1.36863	4.42773	3.66757	4.83807	4.15831	1.69541	8.93201	3.10893	3.0568	3.4758	4.01333	5.37517	14.8504	1.53282	2.8052	7.91038	0.533019	2.60381
CDKN2A	15.3968	1.58108	1.38424	0.760644	25.3011	1.91411	0.438059	0.395587	0.448152	0.511105	18.2084	0.240764	0.661999	13.0456	0.398988	0.341749	0.530166	5.01442	0.840782	1.12048	3.16585	5.19269	24.3855	0.821464	4.72598	0.221094	1.27413	0.583679	0.356698	1.49334	34.9017	1.5047	15.5867	4.63736	29.1448	0.77178	0.481593	11.0222	2.42967	17.3433	6.31995	1.17793	2.85319	27.9856	0.767519	2.14927	0.537145	14.8064	0.231755
PEBP1	123.924	193.011	101.495	200.178	106.309	132.89	140.358	162.976	165.498	88.312	111.639	101.231	108.6	71.9965	133.393	96.0024	139.096	149.832	147.732	165.535	147.458	182.25	109.498	126.452	150.35	268.032	183.282	389.922	132.238	137.261	217.199	315.187	87.727	165.504	118.219	125.737	139.357	117.895	97.2375	146.352	111.538	164.539	127.645	123.711	141.586	126.364	118.273	115.782	220.756
SOCS1	5.3486	9.17355	22.1182	5.24164	6.47326	3.39233	5.65741	8.02078	4.30978	0.64592	3.79542	2.05925	5.45266	6.05657	4.18586	3.57479	5.53546	9.77952	2.51846	4.99386	5.0982	7.51064	3.71155	6.32763	1.77286	8.43003	3.31917	2.38678	5.60773	36.8866	2.07821	3.01197	2.01639	5.31205	1.7791	4.62874	4.20008	2.6744	2.79125	5.55999	4.7375	4.16264	4.72259	2.90618	6.1577	6.24451	5.64038	4.6635	2.45698
CDO1	4.4805	5.13367	1.82064	5.11449	3.14666	5.87819	2.50443	1.59397	2.68788	1.21158	1.03249	2.567	0.523672	0.880786	2.14521	1.85633	0.992863	0.384452	6.91227	3.85297	4.66788	8.94006	1.16126	4.51427	3.45663	54.0911	7.85411	0.214369	2.07102	4.31317	1.28635	36.4474	0.619827	5.07585	1.37437	1.66583	1.65142	0.569274	3.32215	2.5165	1.45516	3.61369	1.63923	0.653806	2.89213	5.15505	0.843742	1.09413	1.487
MYB	0.209844	0.318138	1.26316	0.293735	0.406378	0.483084	0.357786	0.358524	0.694792	0.392129	0.517257	0.434487	0.204674	0.231038	0.599401	0.696668	0.72169	0.45962	0.668926	0.520599	0.685331	0.353099	0.176831	0.232703	0.742888	0.114634	0.701036	0.0131427	0.245071	1.58537	0.797016	0.116097	0.27234	0.419059	1.03071	0.0799394	1.52513	1.71608	0.245835	0.865073	1.99387	1.07708	0.342176	0.348481	1.0381	0.325927	1.98356	1.69047	0.405877
MAPK8	2.66929	3.42051	3.12057	3.62488	2.06213	3.26539	2.87178	2.7811	4.17493	3.07543	2.75628	2.43938	2.93271	3.02377	2.50567	3.78373	3.35678	1.8508	4.82038	3.31944	2.95109	3.18931	1.59469	3.25234	3.78252	4.33957	3.68276	3.83681	2.67273	2.75933	1.79064	2.82183	2.95545	3.0296	1.91402	2.3178	3.2795	1.9788	2.34162	2.88968	3.40324	3.41845	2.39055	3.08598	2.947	3.44815	4.61727	3.7208	2.19267
MAPK9	3.44604	5.13342	5.44299	5.20491	4.09044	4.96482	3.71937	2.55536	5.55284	4.89409	5.69431	5.19029	3.343	4.13982	4.98769	4.4606	3.64244	2.87736	6.08125	5.00023	4.32587	5.13432	5.00106	4.09004	5.98727	7.04007	5.90639	6.57232	4.21136	4.09577	3.23701	5.3741	4.42302	4.87902	3.33842	4.09121	4.59427	4.15447	7.49134	4.28243	5.12606	4.55543	3.72624	4.29115	4.66798	4.81937	6.13551	4.25296	2.9353
LINC00472	0.182077	0.303126	0.249826	0.578612	1.45105	0.094522	0.230329	0.198954	0.51729	0.302164	0.118784	0.451887	0.185679	0.248096	0.493822	0.395317	0.146449	0.208482	0.417824	0.315406	0.493787	0.130001	0.138057	0.171349	0.116512	0.0804706	0.217109	0.041936	0.40249	0.135499	0.347301	0.231527	0.252613	0.398571	0.474744	0.0887209	0.416644	0.0642142	0.169117	0.337369	0.228123	0.769004	0.134705	0.431267	0.260818	0.393929	0.536437	0.883791	0.304344
PRKAA2	0.940422	0.993788	0.548668	1.02263	0.713646	1.28996	0.1585	0.199096	1.24272	1.54611	1.16208	0.901086	0.134332	1.55242	4.14598	1.80514	0.509305	0.595379	1.26368	0.812658	1.16655	0.576864	0.75561	0.642961	0.551598	0.605852	0.73738	1.08629	1.04761	0.0854986	1.45772	0.650108	3.3157	1.26119	2.2514	0.795995	0.26582	0.442634	0.850284	0.641587	1.12889	2.62785	0.670662	0.206553	1.18562	0.307393	2.65635	0.0482709	0.798458
PRKAA1	10.4794	11.2425	13.9492	14.5199	11.629	17.0388	9.77166	7.03538	25.5988	14.827	11.1642	9.07055	8.63242	17.0835	10.7449	17.177	8.89618	7.15063	18.5734	15.0462	11.8262	13.1284	6.35774	11.4886	24.1816	15.5353	17.7645	11.7342	10.6751	9.42029	9.94441	10.5151	20.427	13.5371	14.8241	7.38299	20.1089	15.487	17.3174	16.5992	15.4979	20.2161	6.98119	8.36837	8.98271	14.2553	24.0562	13.4516	8.07819
BAP1	14.7017	19.9356	21.2415	16.6726	9.07992	12.6135	13.1233	14.1734	13.8541	12.931	22.449	9.73851	13.4884	14.2812	17.8264	11.5857	15.8117	14.1558	12.7205	17.5512	15.3713	16.4004	12.6534	14.449	16.0247	13.1691	12.3453	17.0592	18.9939	17.1658	14.8415	17.7745	13.2415	13.8887	13.2808	12.588	17.0987	12.8586	14.4964	17.2965	13.958	17.6402	11.174	15.731	15.3041	15.3955	13.3058	15.8062	21.0599
ABCC1	9.33564	9.58354	16.0145	10.4675	10.502	12.5913	8.73474	6.72847	10.3977	15.0764	15.981	6.80387	10.1274	10.5548	12.491	17.8404	7.56307	8.45976	12.0192	8.68755	9.0622	11.0397	14.6399	7.85092	11.1886	4.13637	5.94776	29.7348	8.51717	11.4347	10.2097	6.63877	19.5213	8.12586	8.96587	4.56939	6.95633	13.1208	15.8788	12.3765	13.3929	9.31646	5.29125	11.7187	8.67175	12.537	6.19729	13.7849	10.2954
ACVR1B	8.96321	13.2788	4.69128	15.68	13.9587	12.8777	10.065	5.97418	14.2252	4.22073	8.34895	9.75075	6.56301	9.22179	11.018	15.011	11.0586	6.89051	14.2343	16.4386	14.6041	11.9961	7.99423	11.2928	19.1885	13.3417	11.7797	26.6695	12.5182	5.23955	14.5546	6.33236	6.26094	12.2727	14.5715	9.00225	18.0477	15.0513	17.9081	24.4413	12.1472	25.1216	9.69107	8.11485	15.1665	4.7244	16.7552	10.3471	16.9817
TGFBR1	16.2039	20.7497	10.6157	27.5733	9.23186	20.553	13.8844	5.47666	24.2411	25.287	5.08874	9.10423	10.8	13.9501	28.9003	11.9381	9.81386	6.33625	16.0735	11.5195	13.774	14.2026	12.6222	16.2823	19.3567	15.9978	9.858	10.4903	17.1819	10.4001	14.8339	8.76219	10.7028	10.5008	10.8027	5.13276	25.8005	8.15826	27.6303	13.6624	15.3143	12.5849	16.8345	11.2687	17.254	16.4008	9.10938	8.35288	2.89598
EPAS1	48.2323	27.768	40.2511	29.6273	17.6171	59.5469	18.0754	24.2586	38.0674	31.9665	30.5335	27.3331	21.003	22.5573	30.6689	31.5661	18.7133	10.0506	72.8082	33.4914	37.3522	58.9238	19.6788	33.5495	33.9607	18.1402	51.911	40.0338	26.9867	34.8686	25.5065	78.6419	22.9526	32.5426	35.6666	14.2337	28.3496	30.8367	25.0014	22.6199	20.4669	43.2923	21.4448	12.6983	38.3389	55.1361	27.1772	34.8808	27.5892
HILPDA	14.6929	5.07703	2.09151	3.87345	7.25078	11.1382	5.38009	6.12197	7.80506	28.0527	6.12473	2.9189	12.7582	5.98939	2.81612	7.1089	9.64266	4.48404	6.45559	8.76099	4.11492	5.89824	2.97519	11.2497	6.53551	10.2818	5.77783	1.62172	4.1028	4.35722	6.37289	3.15779	8.5714	6.20167	2.16291	3.08971	7.57679	17.5842	3.68071	4.44662	5.88122	3.82143	4.87021	13.4735	3.70912	3.19746	3.08114	54.8166	3.03727
IFNG	0.0996173	0.119563	0.87098	0.175726	0.0349087	0.226085	0.0566161	0.0878744	0.691961	0.0360907	0.0706895	0.272838	0.036198	0.120225	0.0221575	0.0323904	0.0142751	0.325148	0.1423	0.0594386	0.0284861	0.0204157	0.050903	0.134545	0.124927	0	0.130182	0.0148179	0.0162535	0.255349	0	0	0.028563	0.127204	0.0388983	0	0.0157034	0	0.0406854	0.0288989	0.107475	0	0	0.411259	0.110591	0.222709	0.927283	0.0805893	0
ANO6	13.123	11.474	6.38542	17.0579	16.3828	19.2701	16.195	5.43798	18.3429	24.5317	11.5427	10.6443	9.96623	11.9168	21.2723	12.0271	8.24907	4.42438	24.3492	11.4199	14.2682	11.8005	9.20774	11.132	14.6122	3.41336	12.1854	1.19225	9.94284	7.3215	10.5999	3.35482	14.2264	12.3448	5.82805	5.55477	10.5122	11.7592	12.5527	8.63623	14.3966	16.6553	10.4695	24.0572	11.4608	10.4123	16.2224	13.6217	9.99816
LPIN1	4.10891	4.31771	7.7499	4.86387	2.07378	3.99958	5.26738	1.79573	3.55152	1.64429	2.69674	3.12651	1.39765	6.06796	4.61439	10.4391	2.24136	2.33308	5.38771	5.75886	3.5834	5.83869	2.09611	4.00952	5.91286	3.08975	3.77178	1.39535	3.03936	5.27243	5.24233	3.08771	3.3159	3.51196	4.86523	4.04979	5.40535	6.39353	3.45413	8.25739	3.01666	6.0023	2.85445	2.71642	4.31548	4.21721	4.36902	3.0471	6.4924
TNFAIP3	25.7113	27.5292	38.2025	30.878	6.35971	17.0592	6.57365	8.97188	21.676	16.5646	6.99316	13.0179	9.30053	16.9017	19.2297	12.6454	5.18753	4.39075	22.9837	22.0299	16.8019	22.7346	5.37225	14.7622	5.98939	3.32606	11.3169	1.15414	8.79898	51.2304	7.21665	4.38289	8.97123	19.0749	5.40753	7.90728	10.7732	6.75671	8.46681	8.50878	8.88074	15.5251	5.9539	8.70936	18.4186	15.1875	15.6156	13.5839	3.65916
TLR4	5.42879	3.40795	12.2848	7.02608	1.8242	9.05426	1.68591	1.47025	5.27043	4.64452	3.63663	5.7622	2.71782	3.9283	4.02044	2.62335	3.56937	1.45045	11.3668	3.58813	4.3007	3.43473	2.30809	3.43903	4.49777	1.42325	5.64785	1.45938	3.56688	3.7237	3.07129	1.90664	1.37015	3.90369	1.41972	2.23389	2.28895	1.17397	3.22918	2.49794	2.43246	3.33342	1.00779	4.97959	2.21253	2.63209	2.81119	1.07944	0.487806
ATM	1.74794	2.02288	15.7703	3.03875	2.47488	3.84643	1.85243	0.616758	3.43023	2.41029	2.40549	3.00319	1.19523	1.65241	2.2904	1.84291	1.22395	0.807428	6.99902	2.64872	3.63254	4.07697	1.4613	2.66335	1.86694	2.97616	4.04528	2.74722	2.05534	6.65655	2.1268	2.17582	3.61663	2.29895	2.10597	1.31914	1.36956	1.26176	1.67148	1.55751	2.49878	3.27651	0.91878	1.70344	1.93546	3.72303	3.3866	3.49492	0.985021
YY1AP1	8.40676	9.83275	13.3985	9.71848	10.8656	9.95645	10.1418	10.4185	10.4138	8.44419	10.3471	6.87154	9.05851	11.4293	10.6365	12.0264	10.2632	8.45851	11.9013	11.0093	9.72683	13.4947	8.62038	10.1681	10.1596	7.89212	12.4786	12.1224	8.24171	9.63955	18.1294	10.4383	10.7479	10.2768	14.9116	15.1061	11.5005	16.3453	9.41354	12.9717	13.0704	13.7129	12.6174	8.18472	10.0286	9.64949	9.44016	12.1063	10.2669
EGLN2	5.24237	4.21804	11.5262	3.09407	3.25824	2.22666	15.3235	7.34913	3.29308	1.2543	5.24951	2.04175	4.40087	3.88144	3.82433	7.98988	6.4319	10.3117	3.01738	4.03975	3.13093	5.72035	2.90658	4.28565	3.32518	3.05985	3.203	5.01079	4.05747	5.96171	3.96754	7.40028	3.36684	5.22631	4.33296	3.43109	5.12994	4.44031	2.50336	4.58115	3.59588	4.08034	7.17789	2.1842	3.65234	4.89975	3.06275	1.82675	5.57625
MIOX	0.101337	0.108113	0.351213	0.0458356	2.28455	0.655116	0.0575934	0.143026	0.141666	0.0571101	0.227714	0.277547	0.736456	0.462021	0.0450798	0.329495	0.125853	0.220507	0.405317	0.443407	0.212504	0.207681	0.103563	2.62786	0.0693182	0.0420723	1.31799	0.0401964	0.154317	0.210279	1.94367	0.202902	1.16224	1.04752	0.448456	0.435833	0.340789	0.593123	0.0206938	0.284178	0.242956	1.32861	0.897027	0.189257	0	0.226553	0.599266	0.185822	0.794471
TAZ	5.88551	7.07419	19.7562	4.67315	9.54218	2.84752	6.51461	6.31168	5.30181	2.18814	8.48961	2.83804	5.95824	9.93593	6.50542	7.55019	5.97	8.53025	3.79244	7.40677	4.41693	7.42144	6.15927	7.44924	3.92335	5.18578	3.83846	5.83384	6.7932	9.35954	6.72429	10.8065	4.93734	8.98282	6.64357	6.93947	8.77943	15.1222	3.0178	9.65155	6.52536	6.90999	6.63377	4.5056	5.93466	7.55	4.53422	7.64304	10.3753
MTDH	15.0615	15.001	18.95	21.4953	14.7595	30.2278	15.4566	10.8421	31.09	36.7157	32.1948	15.4977	15.8565	17.5013	16.6927	18.0899	14.2149	11.4987	32.4079	18.9345	19.373	16.0108	21.3036	19.0287	35.6351	12.4143	26.3467	8.41835	15.3455	13.7756	17.3792	8.31058	26.0093	16.1075	16.665	9.13506	16.0442	17.841	26.3961	14.0388	19.7316	19.7628	18.3753	24.314	15.6387	17.1729	24.2941	24.2791	11.8573
IDH1	20.6806	20.5131	9.77183	24.8828	17.3912	31.9272	32.5877	18.1687	25.64	31.2206	40.9982	15.2333	22.3714	11.9469	21.8372	41.0644	19.8619	17.244	21.5247	29.1977	24.7635	16.4652	23.836	19.0362	41.9497	9.12312	29.5658	62.6583	20.3167	13.7687	40.2028	6.9181	18.3971	26.1749	31.0802	15.5815	20.8203	25.4165	22.9615	22.2668	41.5183	21.6785	29.7873	16.3323	20.8189	16.14	47.1857	34.0569	29.5486
SIRT1	4.1991	5.70116	7.89402	6.85192	3.55024	7.71201	3.25776	1.70271	7.47407	4.1695	4.61147	4.40115	2.15553	4.76743	4.98127	5.40931	3.81284	2.06674	10.7626	5.02685	6.09144	6.91186	2.59752	5.71461	5.81763	3.86858	8.67793	6.05969	3.66268	6.3605	7.2128	4.5191	4.9383	6.06472	4.63266	3.54061	4.47174	5.22018	4.54879	4.08372	4.88987	6.94545	2.38146	3.93882	4.91324	7.12869	6.04664	4.80975	2.72868
FBXW7	1.98744	1.96539	5.25383	2.21506	1.81036	2.52844	1.39097	0.917677	3.11023	1.55829	1.58398	1.9089	1.80222	2.12336	2.25357	2.22435	1.6209	1.35225	3.96784	2.71653	2.24629	3.53403	1.38219	2.82287	2.60601	2.88428	3.77749	3.87386	2.28431	3.71876	2.33229	2.23617	2.0951	2.09136	1.66724	1.09127	2.9247	2.06715	1.65592	3.3447	1.30222	2.50391	1.65391	1.35821	1.61058	2.71075	2.17647	1.26526	1.55611
PANX1	10.9328	8.66893	4.06933	9.21611	8.61431	12.3496	11.4931	9.13765	9.33793	18.6798	10.3699	5.90247	11.91	14.9659	6.43263	9.38203	7.48477	6.08741	12.719	7.739	8.50799	10.471	11.8969	7.8476	8.25274	3.76581	9.89019	3.08951	8.41486	6.4504	8.54619	2.90351	14.6622	7.58568	7.68247	7.08782	6.39631	9.11679	11.051	3.68006	9.29742	7.14189	6.28542	13.49	11.6425	9.49262	5.90232	17.9017	7.68121
DNAJB6	5.32117	5.81791	4.39234	5.11805	6.12621	5.24371	6.96213	5.49551	6.10564	6.36641	7.87232	3.08539	4.36153	5.50474	7.64903	5.37485	3.47949	2.86495	6.11096	5.2288	5.28396	5.65015	2.64592	4.40949	5.93442	5.35657	5.47279	5.2129	5.04532	5.44967	2.62113	4.63237	3.34638	5.5936	2.73402	4.78278	5.32909	5.42423	4.23239	3.94258	5.58943	4.84824	4.49062	5.21611	5.7245	5.825	4.65561	9.574	3.28448
BACH1	8.98304	5.80912	6.03009	7.94938	4.20394	7.74013	4.70476	2.61302	15.0799	13.2078	6.10854	5.55708	6.32742	7.65343	5.51856	6.82235	7.56134	3.48329	9.37018	6.6045	8.16708	6.60889	3.71447	6.58521	9.99147	2.70248	6.9053	3.12926	5.95416	6.31312	7.38016	2.57064	5.6623	4.89307	5.3628	4.06226	5.52958	6.14144	8.67708	3.74248	10.2231	8.26822	2.73612	9.85247	5.27139	8.39404	7.26616	6.00369	3.71821
LONP1	22.5886	16.324	15.613	12.5173	16.5392	13.2283	11.0523	24.0204	7.57106	9.43716	20.8011	7.72346	16.7209	15.0369	16.9304	10.5592	18.9291	24.343	8.92681	16.6575	12.2647	12.2987	15.0092	16.7518	15.212	47.9277	15.8384	22.9285	15.8958	15.1903	25.2676	36.7905	12.4757	20.2314	14.7398	18.9715	16.1139	27.3363	13.1927	17.5925	14.1674	15.3184	21.357	21.7175	13.9777	15.7741	13.5905	15.7631	20.6726
TCGA, The Cancer Genome Atlas
[truncated: 133 more columns]
